# Supplementary material for: A Novel Signature Based on mTORC1 Pathway in Hepatocellular Carcinoma
Source: J Oncol. 2020 Sep 15;2020:8291036. doi: 10.1155/2020/8291036 (PMC7512110; doi:10.1155/2020/8291036)
Supplement: Supplementary Materials — Supplementary file 1: the gene expression matrix of 199 mTORC1-related genes (TXT 890 kb). Supplementary file 2: the heatmap of 199 mTORC1-related genes (JPG 10489 kb). Supplementary file 3: the volcano plot of 199 mTORC1-related genes (JPG 571 kb). Supplementary file 4: the results of univariate Cox regression analysis for 160 genes (DOC 26.2 kb). Supplementary file 5: the results of multivariate Cox regression analysis for 101 genes (DOC 22.7 kb). Supplementary file 6: the results of decision curve analysis for three different models (JPG 988 kb). Supplementary file 7: the nomogram and calibration plots based on GEO cohort (JPG 608 kb). Supplementary file 8: the nomogram and calibration plots based on ICGC cohort (JPG 653 kb). [file 8291036.f1.zip › 8291036.f1/Supplementary file 1.txt]

ID	TCGA-DD-A3A8-11A-11R-A22L-07	TCGA-DD-A1EG-11A-11R-A213-07	TCGA-DD-A1EC-11A-11R-A131-07	TCGA-DD-A11D-11A-12R-A131-07	TCGA-BC-A10Q-11A-11R-A131-07	TCGA-DD-A1EE-11A-11R-A131-07	TCGA-BC-A216-11A-11R-A155-07	TCGA-DD-A3A6-11A-11R-A22L-07	TCGA-DD-A3A3-11A-11R-A22L-07	TCGA-EP-A12J-11A-11R-A131-07	TCGA-BC-A10X-11A-11R-A131-07	TCGA-FV-A3I1-11A-11R-A22L-07	TCGA-G3-A3CH-11A-11R-A22L-07	TCGA-BC-A10T-11A-11R-A131-07	TCGA-DD-A1EI-11A-11R-A131-07	TCGA-BC-A10R-11A-11R-A131-07	TCGA-FV-A23B-11A-11R-A16W-07	TCGA-DD-A11A-11A-11R-A131-07	TCGA-EP-A26S-11A-12R-A16W-07	TCGA-DD-A1EH-11A-11R-A131-07	TCGA-DD-A116-11A-12R-A26B-07	TCGA-BC-A10Z-11A-11R-A131-07	TCGA-DD-A113-11A-12R-A131-07	TCGA-DD-A3A2-11A-11R-A213-07	TCGA-FV-A3R2-11A-11R-A22L-07	TCGA-DD-A119-11A-11R-A131-07	TCGA-DD-A3A4-11A-11R-A22L-07	TCGA-DD-A39Z-11A-21R-A213-07	TCGA-DD-A114-11A-12R-A131-07	TCGA-DD-A11C-11A-11R-A131-07	TCGA-FV-A3I0-11A-11R-A22L-07	TCGA-BC-A10U-11A-11R-A131-07	TCGA-FV-A2QR-11A-11R-A213-07	TCGA-BC-A10W-11A-11R-A131-07	TCGA-DD-A1EB-11A-11R-A131-07	TCGA-BC-A10Y-11A-11R-A131-07	TCGA-BD-A3EP-11A-12R-A22L-07	TCGA-DD-A3A1-11A-11R-A213-07	TCGA-EP-A3RK-11A-11R-A22L-07	TCGA-DD-A1EJ-11A-11R-A155-07	TCGA-DD-A11B-11A-11R-A131-07	TCGA-DD-A39X-11A-11R-A213-07	TCGA-BD-A2L6-11A-21R-A213-07	TCGA-DD-A118-11A-11R-A131-07	TCGA-DD-A1EL-11A-11R-A155-07	TCGA-BC-A110-11A-11R-A131-07	TCGA-DD-A39V-11A-11R-A213-07	TCGA-ES-A2HT-11A-11R-A180-07	TCGA-DD-A39W-11A-11R-A213-07
DHCR24***	303.9367516	190.7518324	203.2373	268.483213	241.6104	258.0068975	145.3819309	139.2744	132.8179	344.8108	232.2904936	275.0609617	196.0329	224.1176864	282.7328	256.4927	272.9570527	208.1395032	210.7817	162.4496	223.4671524	206.9213586	316.0365446	173.7024748	158.1243946	247.6946728	237.1694767	171.32	398.9393728	236.4188003	206.8421	157.2194664	159.5184562	234.5807	256.9770188	176.5729797	337.8282533	171.035019	300.7119834	261.0697982	211.2892763	247.0599603	125.7882878	200.2844	251.4086754	198.1406364	133.36	315.3396805	276.0595336
ATP2A2***	7.79055799	4.81675399	11.21589	9.04451827	7.567279	10.18572461	6.88563194	4.507427	5.939052	7.538048	11.08601231	5.58139991	9.784915	6.66746729	10.22636	11.58815	6.9417142	15.7051694	6.069262	6.205477	4.36905557	7.04662209	10.58255032	3.58264796	5.40083605	9.69967396	7.5870093	6.419619	8.50086303	9.63376963	8.391204	10.66395469	8.76040321	7.990671	9.00679747	7.95336419	11.18463181	2.16600292	4.40234665	7.24268685	9.0470736	4.83445983	8.0188753	6.92126	9.26264085	10.00182763	10.40215	9.05301938	7.30136303
GTF2H1***	0.83502825	1.71811349	1.760647	2.14976993	1.933312	1.92285542	1.5239962	1.021056	2.546975	2.143058	1.73081903	2.55433332	1.744132	2.43182057	2.220864	2.264667	2.85307777	2.25162551	2.137554	1.593189	2.30871133	2.98403841	1.71200918	2.07847282	2.17245408	2.02219999	2.5567216	1.158091	1.85021614	1.78919553	2.076056	2.833642	2.72472111	2.189834	2.0728971	2.41150332	2.34782044	1.40562075	2.2212119	2.48484263	1.91386562	2.20656806	3.20364487	2.88567	2.03058775	3.07081216	1.660752	2.85496317	1.92357815
EIF2S2***	6.29033403	11.33432149	11.35975	15.88648986	14.14996	11.97857453	10.54235591	7.890531	17.29183	14.31903	14.06071367	9.74169597	12.09162	15.93657173	14.35106	15.17316	13.86588473	15.79443781	11.02916	14.38515	11.8795417	26.0833301	12.31788232	11.90683244	14.66525266	12.17507819	24.8432875	9.109902	15.61469639	10.29830522	14.10476	18.16471898	17.6381579	16.65372	13.77808649	13.75153783	17.51734168	18.08165678	10.06006446	18.64322844	10.57107409	10.57424399	16.22910051	14.82302	15.74531171	17.74915105	13.84537	22.77762599	11.32585569
GOT1***	99.76212107	108.4572707	108.1624	122.4322824	147.8033	255.2065855	203.5275597	107.1352	297.9667	85.71048	122.2242234	124.9970895	104.4965	141.89553	117.5729	257.1588	88.574632	334.5829885	92.68711	116.2197	119.3769155	307.4593887	147.9706163	149.352323	162.0740979	234.5261043	106.1620087	111.2362	177.41879	79.46782928	218.4698	206.2421253	158.4551627	192.6909	138.4115306	132.4598605	131.8087176	175.1582516	78.88482847	156.2031189	74.2690871	158.1568441	124.2273481	150.4008	97.89237941	316.9811176	161.5844	137.1772259	95.8052775
CYB5B***	5.13121072	4.37994544	3.926977	5.35193666	4.647123	3.59302856	4.61269312	3.819865	3.819628	5.121466	5.17558241	3.8096178	4.60291	5.2454299	4.849937	4.175382	5.37169247	2.99066089	4.448515	4.596848	3.5805881	5.35365178	5.12016986	3.7178127	4.40950946	3.14082185	4.77408824	3.334457	5.92316692	4.14223112	3.398111	3.68811283	4.50125305	4.292708	4.61667436	5.25697697	6.12697295	3.09167188	5.66335183	4.6808615	3.4246911	4.0664719	5.13221461	5.247985	4.93767005	4.41666083	3.061516	5.23449807	4.4562809
COPS5***	2.32669852	3.57443346	3.22698	4.00959262	3.094114	3.18490686	3.36010174	2.552597	3.567567	3.830613	3.62739928	3.23449165	3.757807	2.73182426	3.687657	3.22514	4.31144713	3.14199139	3.117271	3.388738	3.72066682	4.4424898	3.21375387	3.82319872	4.40920321	3.09681239	4.85570487	2.95444	4.36590046	3.38150968	2.86561	3.42895712	4.10238511	3.85338	3.87846852	3.59292153	3.26927715	3.08682867	3.03713647	3.87119996	2.99211269	3.47216287	3.87816475	4.583858	4.167856	3.81201677	3.486995	4.83806097	3.52694653
PSMD14***	1.58784478	3.48338961	2.547002	3.55852194	2.630576	2.5981291	3.19674111	1.563758	2.450976	4.784989	2.89698081	1.93208409	2.789485	2.53146449	3.592388	3.223436	3.21471594	3.17322525	2.743551	2.763059	3.14143865	3.02459568	3.07549491	2.0460518	2.31179581	3.04716537	3.52307126	2.446442	4.74662982	2.39397944	2.186017	2.8518362	3.69155015	3.490702	3.16151303	2.26538566	2.94362584	2.93528781	2.29643812	3.89716534	2.15919063	2.43225011	3.10632077	2.935535	4.91338381	2.81862997	3.086023	6.10963708	2.533132
STARD4	0.81768006	6.1608917	3.887194	4.43085388	3.624681	2.56343227	2.95162211	1.302976	1.512649	3.363015	6.03866182	1.84048546	4.825805	3.21774726	2.420199	3.2876	4.4400206	1.57602954	2.79555	4.431953	1.73134201	2.84316208	5.21948283	1.29857844	2.2819791	1.03635569	1.57340869	1.212705	4.10577941	5.50838362	2.133928	2.87918507	1.50188681	3.800459	4.86370752	3.66959603	4.35514717	1.0254994	6.83580724	3.006816	1.96102723	1.91943562	3.65236869	4.252163	2.57872413	2.85485525	1.795058	2.51670602	2.20468465
FDXR***	9.61427363	5.1506007	2.61043	5.46902623	5.332764	5.413162	2.52713904	4.351379	2.740678	7.63846	3.01039802	4.80707745	4.917624	3.06727578	6.792121	3.400762	9.11240625	3.42686295	5.30843	4.54121	5.91807949	4.37094121	3.63965927	3.8271666	5.04666219	3.34677738	5.74260744	2.521107	5.79463751	5.18522901	3.309447	3.63581232	7.98086084	5.911912	3.91865654	5.18226764	4.09164961	11.06618778	4.21094346	3.63965345	7.02114352	3.20270667	4.14354501	5.684132	7.41816929	3.2720655	4.616822	9.19206204	3.22571053
RRM2***	0.15288669	0.32809805	0.217334	0.26586637	0.29248	0.40198871	0.74160436	0.06941218	0.1204998	1.563816	0.22452461	0.22940083	0.3981486	0.20652894	1.323935	0.209174	0.41486411	0.29800574	0.05767703	0.4422316	0.90835493	0.12280136	0.3224961	0.07479317	0.19477033	0.14194968	0.3375007	0.7452448	2.7314511	0.64205895	0.09556287	0.22415492	0.53959526	0.1857473	0.22948946	0.26286445	0.18360979	0.29057871	0.61691574	0.35945007	0.40797732	0.12730691	0.48127392	0.8694659	0.61139614	0.13473764	0.2897496	3.05641284	0.08847088
EEF1E1***	0.8259733	1.41013485	1.453994	1.44355476	0.604167	1.30795107	1.54673244	1.382061	2.119663	0.9599623	1.20602543	0.71320881	0.7832678	1.50874218	0.5569367	1.012759	1.75613335	2.17586554	0.9833769	1.251115	1.17308019	4.60365413	1.63656719	1.10664104	2.07949452	1.10160905	2.5450012	1.3353	1.40326727	0.8838558	0.9940147	1.42492999	2.37476426	1.850058	1.33169491	1.56260738	1.34558552	1.67530857	0.90892955	1.76856329	1.05271241	1.14991339	1.97678199	1.916112	1.35215421	2.88695103	1.444568	2.13026237	0.85374553
G6PD***	1.32484792	1.46106394	1.031226	1.31103726	0.897636	1.66259422	1.10729612	0.2843735	1.790102	1.290366	0.92712227	1.08042128	1.29907	1.37955094	1.151178	1.401329	1.6285935	1.40289084	0.9207837	0.6707518	0.85151193	1.94936188	1.34352589	0.82433306	2.06599912	1.15203995	2.35242028	0.5973613	1.59859245	0.84729159	1.036061	1.55811446	2.38915814	1.673777	1.11086951	1.96070492	1.62576987	1.08319096	0.89366982	1.28735431	1.04464671	0.7576039	4.76049366	0.8693391	0.87935083	1.03000776	0.9290112	1.61499028	0.81103998
PPP1R15A***	10.97529561	15.58114895	20.28991	17.3937853	12.499	5.26658467	13.39113736	9.496363	22.12252	6.309152	16.89314187	6.72713998	4.961628	11.22109163	8.570647	18.60778	27.14693286	14.46769167	11.65612	10.38182	5.58891124	32.08986443	11.25731818	15.42170348	20.74328592	11.00067033	15.72079039	7.566961	14.20089269	7.95268994	20.42603	32.23458411	53.69370345	18.15748	8.62767759	19.85065939	29.36648797	19.83666463	12.72289736	23.91168078	12.03679299	9.35371652	18.36148918	7.428738	11.16583695	19.51047031	10.25529	14.34463967	11.77831434
RRP9***	5.68301408	5.58937254	3.423965	4.70207899	3.946647	3.70033833	3.89868711	4.359155	5.826981	4.134175	2.93223674	3.68711407	3.582324	5.33986992	3.512136	4.365902	5.16067367	5.2045698	3.71273	4.520877	3.14234297	9.48128531	3.19785503	3.38581684	5.79786103	3.23153675	14.07650108	3.944751	3.70730272	3.51587763	5.528254	5.32292468	7.44306592	6.129906	4.66055909	4.76902228	5.99337658	5.4598746	3.43085018	5.13114344	3.87879371	4.09743907	5.15472468	3.313976	4.48501431	7.48621927	4.98586	8.5229676	3.27616016
STC1***	0.25167401	0.8962676	0.3759059	2.72688961	1.071496	0.23017559	1.04597362	0.4642201	0.6850044	0.6385573	2.15732098	0.06965214	0.3246164	2.05191816	0.8280472	0.4849233	1.06332723	1.32529425	0.2893026	0.9331816	0.29786454	7.31129327	1.06421748	0.18981088	1.08394924	0.69081581	0.14895874	0.1864801	1.01749235	0.11221283	1.123715	4.24137311	4.70425884	1.600665	0.21712112	0.68018051	1.16778553	0.84518011	0.35062678	0.34403144	0.61580774	0.07947442	0.81491074	0.2873481	0.26721049	2.8517231	0.7335994	0.54869185	0.27325231
BTG2	3.51265903	6.79139535	28.52742	12.24079232	17.35381	10.43130165	5.24090959	4.740522	10.64645	8.66933	8.95092651	7.74963788	4.644325	5.83625668	6.497288	11.46607	28.23000864	9.09480866	27.96738	7.798579	6.62421785	8.15955452	4.83511737	13.64938624	7.22502559	7.1688195	7.43049354	19.91859	13.46556718	4.65796199	4.987348	9.63089444	26.10104388	8.352374	11.40393073	5.50513805	12.68548657	9.50983394	9.09707474	16.82857285	12.05763474	15.57410228	16.76612886	1.945931	5.59700729	5.83193186	4.339588	10.16051095	9.62246572
SLC7A11***	0	0.01549943	0.007700184	0.03012917	0.004061028	0	0.03103087	0.00237731	0.004952422	0.002953644	0.00917531	0.02996233	0.001966769	0.01128742	0.007329258	0.009481816	0.04262627	0.10789678	0.008889259	0.003416406	0.01898262	0.06308769	0.01743983	0.02881805	0.02801704	0	0.25254169	0.005469434	0.02131103	0	0.01510592	0.13494941	0.02178082	0.007484345	0.01071794	0.03376084	0.03509852	0.01685433	0.01718311	0.02750301	0.01164407	0.0341876	0.20491147	0.008427875	0.0414341	0.01922772	0.005954212	0.07867712	0.01410543
LDLR***	11.43097671	19.87771411	39.2367	24.8476142	32.87565	13.91859186	15.78501775	7.543033	27.9368	3.484396	29.59908749	5.24454611	4.387216	16.48946075	12.78991	45.63127	16.6301796	56.41976514	12.67317	15.60039	3.73623559	31.21799514	34.18955754	4.05549	13.47220429	20.19952018	12.9912217	2.629205	15.84802002	15.4074376	29.76747	45.90463815	28.51310651	47.24905	16.06126937	34.44354438	47.97656309	11.163102	13.86221977	43.19962898	5.1220648	9.57561899	25.08456883	16.09307	21.28626559	38.9236484	20.99308	8.68780355	22.35718702
M6PR**	4.62395572	4.75944316	8.465049	7.43736615	5.262926	7.11580282	3.97965206	1.15951	6.038739	7.557551	5.57304047	6.24849941	4.188655	4.83085215	5.816963	5.577038	9.07231444	8.78334508	6.760738	3.337	4.6656507	6.17398213	4.31428913	5.12269438	5.24320495	7.78408176	8.47506196	2.644385	9.79143987	6.34813572	4.918274	5.4861705	9.73852193	3.516631	9.45811431	8.37215891	7.66319991	1.49408411	4.83156794	7.29075717	6.72742372	5.50002119	11.50750097	6.477984	6.63851757	4.47793684	5.980539	9.37869632	5.52704133
RIT1***	0.92994306	1.29217723	1.530279	1.68568825	1.014446	1.72667689	1.53587887	0.6435844	2.035453	1.541065	1.567783	1.48463026	1.345628	1.75009652	1.150821	1.252343	1.88429018	1.62196755	1.093862	1.164518	1.187413	2.00016942	1.36273993	1.13083956	1.75828557	1.48515175	2.19853604	1.247363	2.10600096	1.26718324	0.938719	1.62075653	2.92875442	1.105177	1.36787697	2.28493029	1.50086135	1.26810223	1.080722	1.90169066	1.33971843	1.031613	3.3134086	1.8391	1.65788255	1.12624222	1.157653	1.95691148	0.83315251
MAP2K3***	21.71381849	37.62492748	11.26392	22.49179598	21.47906	11.12920762	11.21677443	16.95897	29.7607	18.3669	19.01519875	11.14288391	14.59191	18.59057801	12.67312	32.37771	15.95900279	44.82847275	14.32348	15.55668	14.26916993	34.91779421	27.31198968	11.02918353	20.1793236	18.52759521	20.39726152	10.82106	16.49240777	13.54787525	40.31884	36.46141136	29.95676755	49.36465	14.27202248	17.14335578	50.19600553	13.16760266	11.19087517	16.34479506	12.00109479	10.63015228	17.98298553	28.75015	17.90408847	60.51804121	20.66592	21.02805267	15.53588268
ARPC5L***	4.62234149	6.56874613	3.358531	5.74751898	6.374393	4.53501479	4.4308957	5.671949	7.69418	6.202627	4.16739536	3.59699078	5.191649	8.45604964	4.750571	6.810354	4.95844377	6.99256063	4.04143	5.508607	4.03620664	11.23364359	6.2786473	4.24325206	6.90799111	4.09157187	8.39884092	5.007365	5.45287414	4.03022023	7.542121	11.50876978	7.33229243	9.193281	3.56308865	5.18652132	7.34956063	7.47506002	4.21341529	5.56356347	4.57316964	3.67744975	6.62847394	6.079626	5.77075508	11.14249531	5.212566	8.8957059	3.63461606
ACSL3***	2.9127974	5.30397315	7.732004	8.53324271	9.291725	6.851568	5.49805699	3.192347	6.551346	7.421018	10.31462275	4.37471612	4.527524	7.74400062	5.885684	11.23362	6.99122494	21.33346535	5.798688	4.605891	3.44974772	9.39318698	10.72204573	3.666331	4.60149213	7.58978644	9.17905837	5.360276	7.97108835	7.41119647	7.045861	8.66286488	5.80056652	10.41171	7.44101086	6.81630193	7.79391189	4.43287244	4.4764684	7.33478294	4.75831495	6.16627663	6.10030082	7.035879	5.91862653	8.98056076	6.364185	7.54871349	4.85016666
SERPINH1***	4.98319231	4.3426918	7.167629	6.69028834	4.51547	7.62377455	5.44094768	3.975507	6.585579	6.863994	5.61621245	5.19478234	5.365809	8.86622296	5.498165	2.996294	10.25219333	8.06177521	3.681418	6.615058	3.50849219	7.92486141	5.92182361	4.68529404	6.77956919	5.35679157	13.26495081	7.464531	7.24597045	5.23459504	4.388095	6.46997013	12.44039789	7.759976	4.1833072	7.0461162	8.08595795	5.34967049	4.80787232	6.63204827	6.59924147	3.70228146	7.78789822	4.356032	5.42779987	7.04217149	7.074341	8.73975623	3.88213131
PSME3***	7.2924227	4.69338822	5.993213	7.21225201	5.614522	6.35006233	5.39937814	3.560428	6.513138	8.520933	5.66349986	4.34901084	5.441945	6.51258637	6.369298	7.443502	6.33797278	8.28714432	4.928652	4.409914	4.45102823	7.31908209	5.84007344	3.33290775	5.43610725	7.37900723	9.70963906	4.187859	8.23701736	5.09820773	5.63118	6.84815344	9.00029153	6.126465	6.26886047	7.05770047	7.08820027	3.52039129	3.62786911	6.31586923	5.6404231	3.49507699	7.73882553	5.406502	6.56828428	7.0624154	4.559046	10.77101208	5.27252006
HMGCS1***	9.33584809	46.65664749	10.8196	39.0139243	39.85585	8.97142693	14.74609704	5.92491	6.557427	16.53413	21.23266253	21.31036354	12.44192	65.57495631	23.89833	33.40797	21.28426408	11.46397377	13.98558	20.65935	13.93662986	26.09112296	59.53163853	6.09522452	15.78374943	8.50779226	7.57711637	5.06734	23.77388258	19.12650065	14.08318	15.50905662	13.12721131	57.87049	18.1660847	30.46707332	162.8054668	5.43282628	156.1164893	52.65731719	11.2080184	9.18669861	17.17429695	27.13019	19.08753657	25.84566155	14.86803	13.95137566	9.8471463
EPRS***	4.19631702	3.91216533	8.261494	8.07625401	7.255177	8.25579334	5.69296868	2.751499	6.056216	7.772752	7.07966929	6.13677002	6.919512	5.48130945	8.443971	6.295374	8.07463448	7.374706	6.161521	6.560017	6.16170302	8.59360044	6.11872887	5.31533562	6.78217098	7.27558878	13.33783722	5.059096	8.85134013	7.30391266	5.062624	6.12661407	8.85858417	5.423922	9.45138924	7.44850939	8.79699704	4.82779883	4.86549927	10.01731626	6.87236971	5.27951262	7.9240659	4.285582	8.73773515	5.58055581	6.125694	8.86672113	7.36677807
PSAT1***	62.93919233	62.6954413	48.1997	55.56915111	47.19746	32.17414746	44.81335587	36.50012	51.11716	32.52411	70.28938438	50.10159802	90.0357	54.62263227	84.69314	65.63542	60.0058909	51.86868127	54.89826	51.71598	118.8645605	70.86618654	64.97078994	45.06879607	91.34804222	57.75883537	81.65683228	28.07208	39.52063646	36.42150054	73.48923	48.2800757	17.7798241	59.831	79.67050286	80.9345638	91.99012767	49.94825991	49.10830724	67.14796615	62.62095577	44.49030862	42.2375536	86.82239	66.14183022	66.8320049	43.66621	29.67150605	70.26186177
CFP***	6.2819245	8.48569826	7.737631	8.78476666	3.727695	7.70390924	5.10158056	0.3607735	11.83714	5.534471	5.02264874	6.64366327	8.651512	3.16418845	6.185436	9.606203	6.23039927	8.93383661	3.456831	5.033417	4.46782347	1.62695392	3.60693379	5.96947555	5.87994436	11.47802873	12.87032475	1.225824	6.7929876	7.20671957	2.961055	3.06813499	4.49900519	8.427806	8.18425041	4.11535906	7.47181969	12.36759546	2.74850233	5.44081217	2.47267033	5.84613157	12.81777134	8.597648	10.21222755	10.51269503	3.827722	5.22189981	5.61576497
MTHFD2L***	0.54214781	1.47680284	2.732398	0.47747018	0.6242884	2.59823848	2.04053216	1.693007	1.340214	0.2030912	1.22959208	1.51865922	0.6433281	1.50566802	0.3556493	1.209241	0.66027182	1.18588361	1.199158	0.7584255	0.56404868	1.69505434	2.20987122	0.93571602	0.94159623	1.37713711	1.15332392	1.921568	0.32849309	0.96411154	1.020129	1.13469653	0.67491016	1.306768	1.58221011	1.43888735	0.89208066	1.00043497	0.96208075	2.198558	0.6061998	1.13155952	1.41228895	2.050315	0.56454645	2.73672548	1.684425	0.70212341	0.62503565
AK4	18.1130266	13.8681576	12.95138	15.18041826	14.27085	13.10634037	9.68503925	12.68093	6.350535	21.13848	20.38311074	16.47684476	16.99694	12.92671292	18.34339	12.71375	14.58157591	6.74387189	14.20086	15.91252	13.84994125	8.88684396	20.34889513	12.81915635	9.84444769	11.06368358	17.58007128	12.13818	21.63652346	15.55384911	11.15364	11.56050228	8.09477319	14.10056	17.87413856	15.8104115	17.20992872	9.30691931	16.72328106	13.18514795	17.84345972	12.7813875	8.16251203	13.43697	18.62934845	8.40869624	13.45149	13.3523568	16.45679904
TBK1***	0.92010206	3.44142461	3.275165	4.03978268	3.220183	3.3290583	2.59780891	1.343392	2.888836	4.217548	3.387554	2.9493395	3.218678	3.63500029	2.906602	3.767295	3.51651713	3.9543051	2.805684	2.996196	2.64967947	4.26554382	3.68240192	2.63630416	3.03590995	2.95036324	3.98893914	2.688223	5.11322206	2.94118623	2.619755	3.47672982	3.5572794	3.384216	3.95399821	3.93182318	3.38116456	1.43862758	2.46326685	3.76936168	2.13435358	2.34526017	4.54817601	3.709858	3.81434604	3.82430223	2.930511	5.03488897	2.55853681
ADD3	0.97035169	2.53400535	3.468729	2.70115082	2.323409	3.15364138	2.24206445	1.251446	2.964843	3.597462	3.02672213	3.72002476	3.393105	2.56647443	3.618292	2.192744	4.4747465	3.80761826	2.643369	1.909268	3.01366925	2.73057638	2.18584465	2.67237031	2.33415017	3.11571258	3.1597071	1.822674	4.26883997	2.47341288	1.656656	2.68767811	4.01460016	2.488619	3.36175627	4.62695005	3.11173042	1.8213314	2.37044217	3.70010868	4.02629764	2.51617418	5.56108071	4.796931	3.97521147	2.94295292	2.490524	3.45323712	2.61375258
SHMT2	44.47832995	33.73844814	30.64065	37.90119468	34.10454	33.95199411	25.65592075	32.35106	36.3133	37.87983	29.64060147	43.66459149	34.01412	30.32437471	41.05847	29.95476	34.39377724	31.66071789	47.48787	36.06042	40.16784267	42.12593289	38.09259728	42.3512946	45.89249974	25.47101958	62.24558016	34.83044	29.50128294	45.73431939	35.46424	30.99990452	31.50074145	32.31831	41.61417085	34.63608682	44.47166871	49.30658276	37.55992344	40.1980664	33.07348659	41.12778055	32.05283838	35.09885	37.03266199	34.7443461	31.52744	28.18296135	45.68639956
RDH11*	6.68257185	17.49108245	12.47675	19.88915642	21.48666	12.39178958	11.83924451	11.57677	6.223963	26.26276	25.11499208	17.41531676	13.1872	22.7598957	22.02711	12.93279	20.48659438	12.85755716	17.49025	21.11853	19.84995286	9.92772116	20.69820071	10.94461478	10.65128632	10.44270106	9.72445269	16.87997	27.21247645	22.48544444	13.23495	16.14364231	12.65342921	25.97105	23.83240677	15.2576519	21.84417091	16.7585067	40.63017522	21.31233871	13.98750424	20.04459086	14.45104353	15.02584	17.33954678	8.22734723	17.73778	12.84211989	13.62331446
ACACA***	1.53621114	0.92369481	1.560102	1.48931861	1.687731	1.26275944	1.01492425	0.5781645	0.6426098	1.5155	1.31301523	1.24261921	1.026639	1.30392809	2.147676	1.463506	2.77889326	1.33408537	1.403902	0.9499319	1.3242215	1.11853082	2.00269728	0.87013734	0.96746113	1.0787243	1.75233655	0.7367316	2.33374835	2.04605969	0.7784375	0.84451067	1.13488724	1.273586	2.00150859	2.04571516	2.2299646	0.88906717	2.12911309	1.83435993	1.5432728	1.99375138	1.07735763	1.308122	1.33095684	0.81263297	0.9300619	1.10218697	2.14287287
RPN1***	70.66034377	51.05085476	53.26869	72.34807776	70.52705	62.93065762	52.62280541	59.50553	57.24873	76.26506	47.82969746	39.5353912	55.71574	53.44088165	69.45821	52.17872	56.94475113	70.33982358	52.04637	61.75468	46.73116436	62.8170494	60.73913881	38.40303925	58.31620356	50.59809766	68.04666376	60.16608	74.88113962	66.49626465	49.35327	74.50433868	75.98462982	67.23634	57.13642394	44.63635443	57.16111074	59.37187837	65.83021827	64.29466273	60.83769655	55.6544714	60.15462395	49.24995	59.65802814	81.08853053	98.75417	72.84910841	58.0190941
LTA4H***	3.82467748	3.87458939	4.524302	4.51774406	3.602446	4.58473542	3.6240888	2.423939	5.368	4.744106	4.979505	4.03926112	3.448059	3.46597347	3.972144	3.127206	6.01097927	3.15509402	4.158531	3.972081	4.8532693	4.67743717	4.09361338	4.95814273	4.98956541	3.91393907	4.99567919	3.720201	6.4642845	3.75835126	2.988268	2.84047026	7.5248001	3.425176	4.64733489	5.16862442	4.12505643	4.65405129	3.63280498	4.31885153	3.61751073	3.90108684	8.62460937	3.443171	5.00044168	3.50465294	3.685313	5.44994677	3.88499654
CCT6A***	9.99315478	10.51445173	13.1602	12.72334549	10.91922	12.28939408	12.42044782	7.006295	12.63028	14.40096	9.9297372	10.00576089	12.58959	14.89143626	14.34834	13.55411	15.90998897	15.72132428	11.41034	11.54265	9.39451308	18.79108836	12.39131935	8.83116462	13.89863812	12.14789193	23.87611608	10.26385	15.49095016	8.33437008	11.09251	13.45295826	18.91178433	14.87771	12.71597685	14.00934384	13.53753752	9.50702692	8.31747253	16.89952396	10.63764937	8.68421832	16.057301	12.07877	13.47957635	16.19193691	10.39825	26.84026907	10.8112092
PNO1***	2.25877116	3.32639337	2.923237	2.91247895	3.098041	2.46938396	2.84170149	1.414851	6.082408	3.014987	3.11565209	2.16866126	2.333942	4.6413056	3.16707	3.921657	3.37069627	5.45376403	2.442144	2.513857	2.00273246	7.34867218	2.31174782	2.09623314	3.13996142	2.98546889	6.13842365	1.972801	2.98602404	2.37950794	4.052426	4.72478374	5.07084919	3.428454	3.61739199	3.91029439	4.71580566	2.20591143	1.74229038	4.30348307	2.50947969	2.19819095	3.80548289	4.651043	3.30238465	5.92972867	2.806273	6.15269825	2.14816785
SDF2L1***	16.00320953	18.7715199	14.22518	20.67752073	14.11353	18.54631232	20.62157447	28.45803	15.16867	26.46601	6.46492613	9.20339878	15.81078	10.50037693	24.45551	11.77477	15.16523297	22.80284298	15.09562	15.03644	16.29849963	12.35981643	24.96705673	10.15862585	20.07451199	11.69601146	19.10358182	16.33621	22.18451843	16.06269515	13.32349	24.27102588	15.79610237	20.55903	10.58873794	6.63361669	14.01537523	42.26180686	22.01704826	14.63166793	18.80300707	13.37116151	11.68175205	14.07789	16.56286615	14.19150365	44.38202	24.03468541	18.19735091
PSMG1***	3.89950197	3.97506148	4.134218	5.60008433	4.812366	3.71041747	4.95846134	3.537381	4.862077	4.791403	4.13701209	3.83017524	5.581479	4.88278753	5.655256	4.799873	5.94784051	4.65226373	4.891947	5.175244	4.36182386	5.80657589	3.7370083	4.50049564	5.63319168	4.13906091	6.93124306	3.586763	6.09184875	4.27313381	3.178967	5.23049962	4.86747566	6.580022	4.59768748	4.92714793	4.82886368	5.07855848	3.9684665	5.3138685	4.17523381	4.4748103	4.80592358	6.313333	5.37694986	5.96541473	4.353748	6.34266524	3.90079139
HMGCR***	3.54802107	9.87092398	5.365479	10.73233042	12.3493	3.41125783	4.86915851	2.656314	2.866735	4.840421	8.13661566	6.40746102	4.379922	16.14000969	6.772203	11.68105	7.20540313	6.22484364	6.253805	7.006446	4.08742999	7.61644798	19.54410393	3.11566506	7.07471656	3.01884898	3.50385557	1.793789	7.18942817	5.93668624	5.406482	4.82239925	5.22078724	16.28988	4.09411295	11.21213104	46.11486916	2.30920825	33.61139258	16.43040606	3.35204592	3.19255155	6.73582202	11.85842	6.07542588	7.44491128	5.639654	4.68909367	3.0548826
EBP	97.90155693	116.8274953	42.49076	69.27335357	65.03713	38.24977812	37.57551779	86.46263	57.29355	90.60782	75.10314534	90.05893107	66.92472	82.27624346	78.8191	49.08576	65.83704058	34.13306465	98.37737	99.04521	77.88878177	55.85875116	74.99149252	77.16349664	82.14256421	33.55488883	60.84770885	70.62159	54.87629067	76.6771733	67.54874	63.26573983	52.6002582	82.94406	94.25274332	69.30440918	120.5530596	99.76480193	226.6848782	88.82067981	63.46119877	106.9553644	54.01154898	66.11376	83.55030655	58.15275445	70.19024	39.3954093	92.19134219
GLRX*	4.133895	10.61524357	7.694435	7.34675837	7.312517	8.03308977	8.18849611	9.304841	10.73783	5.970726	5.97729783	6.14267002	8.505372	15.53380508	5.661339	17.80187	6.65018031	9.50140676	7.625596	8.536538	6.97924611	16.90102129	7.87986514	6.24263099	6.08592044	5.58214192	5.5051555	8.735374	6.55234455	6.36690575	8.546356	13.76519646	6.41191337	9.580684	6.50572683	4.77549764	5.30896281	7.32226715	5.4355218	6.28675489	5.73787766	5.18783708	6.95208951	9.596712	8.8405204	18.66197296	13.4129	8.21170397	6.78469034
TXNRD1***	4.16020204	5.48505162	5.292223	6.87067702	5.459548	6.9393794	4.21385439	3.971926	7.298786	7.725027	5.7538521	5.60338993	5.030816	6.39115535	6.097441	7.861865	8.88227076	6.52627029	4.665171	5.275735	4.86968462	9.52452003	7.67627032	4.62467527	5.47573211	7.28211089	15.93092222	3.824596	12.50654978	4.76583355	7.808279	7.24656202	9.28983004	8.183935	7.79117903	8.05806115	11.23181554	3.96048824	4.02166593	7.09734977	5.09801867	4.54373682	7.13440397	6.248796	12.13609001	8.02848625	4.662988	10.7925827	4.74582075
FADS1***	5.00152268	7.26088497	2.154361	2.19296182	3.279366	0.62946419	1.20438748	0.9458558	0.5252871	14.14927	5.33990556	3.76840945	2.866747	6.47456042	4.461184	12.78959	3.1795439	1.38293362	6.803917	2.563948	2.72185169	3.31338787	9.72576185	1.51095943	1.39998934	0.23548488	2.48405981	1.782487	6.53001838	4.54345151	3.291704	1.60312776	2.29061805	1.280728	5.20553971	6.82228109	14.75670469	1.64580407	23.83812907	9.989322	5.08840047	4.05149605	1.75151606	0.2463238	10.02324719	4.30907108	4.285141	2.79666804	3.15625173
VLDLR	0.17538855	0.08203733	0.2027884	0.29249395	0.08597886	0.14900624	0.11038625	0.1644987	0.09717914	0.2989414	0.07986869	0.1237763	0.1360912	0.04662902	0.1301938	0.2284916	0.76193567	0.23340508	0.2647051	0.1393697	0.16337171	0.10923012	0.39399635	0.05787114	0.16327631	0.08849436	0.71821836	0.1016756	0.15745117	0.19110065	0.1170066	0.09105581	0.19836046	0.1990366	0.19608166	0.17627229	0.11780779	0.12681936	0.10647676	0.20018174	0.28260163	0.05065899	0.19763379	0.1102509	0.34371419	0.18864849	0.1434838	1.19807966	0.17966713
PPA1***	8.03772458	11.84936115	8.416401	17.04649142	12.91102	10.4689178	14.08712515	6.739957	14.31782	13.92717	10.05318124	7.9954297	9.328834	12.51834981	10.87907	17.2906	16.45181835	17.47612623	10.63076	11.35865	10.88752213	21.12208419	12.32847015	9.54988808	12.30294617	14.7445946	26.24484177	8.834622	17.74969974	8.60584645	13.76736	16.02211465	16.46822088	18.02569	12.77724191	10.10685473	10.52776764	12.66905747	8.21550905	19.46181788	9.95799677	10.57978373	15.79982512	14.23162	12.85645049	23.85297318	15.54079	32.68139015	8.98326147
CYP51A1*	1.26143337	1.98607173	0.9616228	1.36001329	1.783451	1.05820722	0.44894725	0.6472393	0.4924341	2.964867	1.86499809	3.35283236	1.275807	2.56535176	2.349416	2.132536	1.7854306	1.01830993	1.911578	0.6713188	0.92127928	1.1333567	2.05407632	0.92862297	0.95229497	0.56973252	0.68265444	0.5913204	1.72315867	1.85702735	1.631666	1.69114732	1.35006666	2.281299	3.90038001	2.14915311	6.84487353	0.60422765	10.83900897	3.22769753	1.39212275	1.57652169	0.62945075	2.00191	1.68340687	1.33375698	1.334451	0.98284151	1.67340682
PSMA3***	9.56435742	18.16527092	13.34043	18.82025047	12.48272	11.64386979	15.4172378	13.7472	15.62085	17.17129	16.29835009	11.92143578	15.28385	14.93214236	15.91051	13.0967	15.96986875	12.62922566	13.60227	15.76779	14.05881162	19.87606671	15.72728993	13.33261502	16.62833441	11.14011479	28.85996314	14.28049	19.33937755	12.12813308	11.78909	12.00737361	15.52807511	17.76311	15.5727092	13.96058879	14.91019612	16.40268256	10.89877642	20.11196318	10.11808035	14.24456408	18.16653314	18.15641	13.06081253	17.68298991	16.60801	24.87315364	14.49111596
GGA2***	3.88543858	2.29977263	4.538566	3.81294515	2.667234	4.48186478	2.35946695	1.729924	3.635702	3.679095	3.0534353	3.58585557	3.235714	2.79343151	3.830403	3.401724	4.43009326	3.31799413	3.150943	2.690224	3.15674331	3.07225668	2.10488871	2.95663676	4.25383989	3.56978408	5.78601027	2.050888	3.75156924	4.13382136	2.159517	2.36987625	4.94441137	2.727494	3.47530315	4.5582608	4.03569274	2.81574744	2.41396108	3.74148686	3.60212272	2.89656054	6.09212638	3.512456	3.45659279	1.89484419	2.56059	3.7524525	3.35897771
CDKN1A	60.4633135	64.20192623	25.93911	52.66930641	46.96381	24.85232713	27.09444172	29.25159	128.1698	44.03948	27.57257617	15.16627583	15.0512	60.82280814	25.5599	91.59704	75.10257183	78.33339806	42.56392	15.90843	17.75847778	78.21060866	63.01564683	24.37252962	28.43367779	29.51808793	9.32110543	9.547372	44.76368459	31.27975928	110.7115	139.4390927	103.9735301	135.5923	33.55921046	26.60740066	81.64839763	28.63645484	24.92305471	49.25963841	34.97169175	9.22706164	48.92060764	37.61405	31.77190087	182.9766851	42.55976	68.6371138	6.2893795
PSMD12***	2.8894736	8.33646607	7.601283	7.73622055	8.061549	6.86719941	7.21015496	5.360396	10.70819	8.051388	9.05746281	5.58865696	8.098457	8.46338314	7.032169	10.21249	6.68885674	10.9746188	5.058861	8.348384	5.51810784	10.65315109	9.47419698	4.54268466	7.50263379	8.267504	8.97684445	7.110402	8.43909553	7.63800365	8.318343	9.87433185	8.37042691	10.17394	7.61240773	8.9810149	9.56914356	5.22124769	5.08082653	8.66606963	5.27617207	5.0861947	7.48473175	11.41107	8.3731306	14.42399756	6.595056	9.40318739	5.58548512
SCD*	234.5279582	210.3364317	70.52508	72.74470715	185.1378	133.1359652	29.06844479	88.69333	21.1304	455.9816	134.3871523	115.5695376	137.5907	102.1507332	190.4166	74.92809	483.8740801	107.2561966	234.4733	194.1309	161.9656559	48.74307816	247.5699358	83.1293066	29.82374391	38.90652375	95.03952601	295.3508	432.0965981	241.0196968	131.5909	66.05194251	116.4461133	216.3206	688.8948092	156.5499415	221.6599924	119.5704584	476.3128362	213.9809898	230.3897661	449.7466767	67.60703697	55.84871	516.8610163	35.18111922	134.8314	132.0159147	167.1337019
CCNF***	0.11358452	0.10070394	0.2678084	0.17195929	0.1210632	0.22921868	0.31098908	0.05451535	0.143851	0.3476887	0.10420001	0.18627558	0.192431	0.10353506	0.2621909	0.07730934	0.24813089	0.15603302	0.1630754	0.1880242	0.21281359	0.11346643	0.19996098	0.19335746	0.36712772	0.21182205	0.26218713	0.2536321	0.47866995	0.22138423	0.07794042	0.05226429	0.16951622	0.1287206	0.2036453	0.25232784	0.33871302	0.22821644	0.34149689	0.15817203	0.25811584	0.18406341	0.25112754	0.1202532	0.1491629	0.03821316	0.1759838	0.31989122	0.17969945
BHLHE40***	71.7111645	89.50723385	54.83987	71.61012782	92.91954	12.22415188	62.36240155	40.87449	109.8608	15.30194	115.8693221	24.24666631	15.87465	74.21236053	33.26166	76.06709	37.84004612	156.5918885	23.35774	76.62859	20.99914396	134.0627837	46.98907095	34.4489767	52.43714788	36.85448698	35.27457123	44.18742	34.56035288	48.77757583	47.43114	116.4700489	185.861537	90.34131	46.77045952	44.02558039	135.9681196	34.57706948	57.65289227	41.21034713	38.79672904	66.66451097	32.39059421	22.5126	26.12203978	128.4288383	28.29761	28.41566249	26.43484322
CALR***	281.579863	139.3845196	224.864	395.8699218	293.8512	368.5274891	342.092591	199.4685	190.026	450.9359	146.2524849	132.5676008	245.3103	186.8150075	311.659	240.9688	241.3039752	374.3233194	136.403	205.2107	193.8248446	190.122214	372.4775583	113.587902	201.3596761	258.3243739	215.4290287	230.5063	630.8611942	336.3124634	195.4745	291.0043008	284.1029113	208.5137	196.1276447	101.4623446	202.8859334	358.9446848	229.9784891	290.4787872	283.560922	200.7531775	175.5776636	172.4675	235.6353061	213.7884254	412.6704	362.8881836	230.4709361
SORD***	54.1729433	37.43672225	48.73441	39.53563034	50.87023	31.3304554	27.78518104	35.57575	32.73207	42.7249	56.27953649	68.57041651	44.71181	35.1330214	64.25634	46.44374	40.2288154	31.3798116	62.25287	43.23947	48.03356576	23.21110356	43.48902412	57.05571679	36.685528	50.99621946	40.31540306	29.80097	21.91071984	53.36164269	48.16931	39.93872373	16.58617115	31.57207	54.80796781	36.3301679	23.41823352	26.71816956	50.92931798	41.51512417	44.44235394	51.15886806	25.29474144	65.45798	53.08080897	13.26373445	28.68777	19.04225895	76.20744802
NMT1***	11.54046288	7.66906003	11.01941	7.57318313	7.555918	9.83986235	6.59709563	6.322795	7.534854	11.92656	7.002629	11.38498196	10.12047	6.80072579	9.885462	8.636916	10.34500401	7.49016231	12.18538	8.453977	9.92901655	7.16235418	8.30442528	7.83082009	11.73038712	8.97262118	13.06675726	7.865311	10.56921351	7.76068087	6.95549	6.10230749	8.09845991	7.100667	10.56044649	11.13784699	12.01132546	7.58773702	9.0706013	8.49124059	10.87032949	8.98368707	10.22536673	8.909985	10.25277168	6.50706657	8.935599	12.17271312	11.43753792
PNP***	13.02467973	10.69090152	6.239863	11.28027692	7.168452	5.37275259	6.57622873	6.908108	10.32297	10.31731	11.09978178	7.15892048	15.9813	6.48099958	12.06473	9.519358	11.33517652	5.24603108	9.045288	11.91786	9.370383	9.1147155	5.56254096	9.2896271	9.78843972	4.85589072	7.56254952	4.384374	4.52674727	9.52364052	12.03872	12.85968433	8.81295778	8.393273	14.18264988	9.49308597	10.21341785	4.93184259	10.73997476	6.17090484	8.20799591	7.71032519	7.64394097	10.36298	8.40320594	11.26867031	6.303848	4.71220682	17.54135664
ATP5MC1***	28.42147101	20.41580949	7.540431	17.5950322	15.44277	15.0253798	14.13485725	25.67364	17.93741	21.40677	11.92675781	11.86153275	16.92383	12.97246394	18.21468	12.16447	19.41062445	9.76076654	21.90143	17.31358	24.34747419	14.89207226	11.77932652	15.81369069	21.50132629	10.67144755	22.18122984	16.69661	20.95052306	13.67930209	16.28292	16.54483893	17.34505453	19.80643	15.25911432	11.33836099	12.20923883	33.63984878	17.82304376	18.87756554	14.0437548	16.87484856	15.4529405	21.62469	26.58132823	17.33952835	17.88369	21.59737391	17.45168791
GPI***	47.88749467	14.96848029	13.87028	23.74219952	19.07707	22.2369845	12.33549672	18.43241	16.53361	36.86981	24.17042649	14.79820066	19.4254	15.41487626	22.82242	16.41461	16.84525099	18.08192408	19.63863	22.70099	17.48425776	17.38190999	18.17383268	10.83391325	19.92239503	18.95029073	32.81777266	22.54957	33.80864259	23.63110255	17.82633	19.33144372	19.69934051	24.52891	22.45962605	17.367531	20.61912812	23.69945148	17.08884398	20.66936132	27.13389609	19.16986882	18.64064766	12.4892	24.01000278	17.46239013	25.40748	22.64133382	20.59249942
SKAP2***	0.5860432	1.51658583	1.72889	2.68836255	1.014694	2.83237142	1.64165193	0.5275368	1.981601	2.632034	2.08185151	1.8707353	1.845401	1.60539551	1.810809	1.932865	2.33180106	2.41517302	1.467779	1.14613	1.52020037	1.18985742	1.34078183	1.16931512	1.84625338	2.37957624	2.27546144	0.5383578	3.82675541	1.57439482	0.8380195	2.10957709	2.38722724	2.229674	2.06267581	2.53983582	1.67499456	1.1359009	1.41778793	2.17851721	2.03454875	1.03368201	3.48569468	1.904547	2.26299288	1.78060218	1.446113	2.65875084	1.42673943
SLC1A5**	1.81885609	3.67336738	2.39611	2.78502223	2.24526	2.43212626	3.42328282	0.922121	6.092616	1.735607	1.57459203	1.2604863	2.33418	3.19543935	1.739687	3.078595	2.96606861	2.46904988	1.500996	1.824581	1.30501977	4.29687709	1.72271003	1.50616562	3.89278787	1.68874115	9.65057857	1.018534	3.04169988	1.29247663	2.333901	6.48449735	4.28153361	2.578089	1.71522717	3.4367009	3.39718996	2.49513353	1.70771309	3.2565016	1.69370688	1.38976219	7.79916875	1.366166	2.08923482	3.46190783	1.884405	3.94432096	1.3973067
SSR1***	6.47481676	5.10425256	8.98987	9.06260966	8.038038	7.17183546	8.11077106	6.263141	6.999298	10.27161	7.05467216	6.02299697	7.946157	8.63339536	9.532562	7.342332	7.5392146	12.55127845	6.417614	6.812942	6.31182898	7.77265085	7.41251328	4.93224652	6.97645052	8.12499659	9.01419614	6.38356	9.67699479	8.48152372	5.714443	7.40727548	7.63811751	6.688176	7.2895578	8.64261042	6.92397268	5.48803579	7.21395259	8.63708612	7.86218908	5.62393796	7.85091525	6.661096	6.20656892	8.71289849	7.570081	7.66945619	6.81426404
GLA***	2.7067878	3.71920248	2.130942	3.58378091	2.873629	3.43548417	2.31897512	1.58783	3.735703	4.138677	2.65701874	1.89392428	2.948768	2.50947927	2.800242	2.539106	4.10441155	2.64235192	2.138233	2.896198	3.46521359	3.26730164	2.50477996	2.1760421	2.98172156	2.86964349	3.17773485	1.967049	6.11006963	2.12306407	2.345963	10.23621008	5.63223783	3.591847	2.57453097	3.40778796	2.72541488	4.40840787	3.08544255	2.36118695	2.82807203	2.29106202	5.05433394	2.807972	4.61341869	3.05343705	2.808846	5.72326507	2.12287274
TRIB3***	15.35879657	8.94057251	8.802326	9.74858522	9.957541	8.3112444	7.31139612	10.29609	12.60919	6.495638	12.62754059	5.44760448	9.379787	10.00537614	7.596059	13.1559	6.31771439	21.76616753	9.903603	18.50509	4.08312282	34.58911609	19.1155649	4.78449051	22.18519723	7.41969743	74.67851461	8.858683	5.5435698	14.21297732	10.80845	5.92802026	10.2385215	18.95053	8.27409403	10.87307595	28.81629368	13.95806318	10.52107542	36.75122274	11.60190466	9.79423858	8.24292602	21.32774	11.55867057	8.39229678	12.44783	15.15349639	8.32409937
POLR3G***	0.08151051	0.26037428	0.3511065	0.24583874	0.2485194	0.25119927	0.27719185	0.2167972	0.3149544	0.1772076	0.36803812	0.34035095	0.2454375	0.26546348	0.3166043	0.2237569	0.35803836	0.35341287	0.1848851	0.3115569	0.25814762	0.31170802	0.31912906	0.23053008	0.35059144	0.32814165	0.4748996	0.1487593	0.28718925	0.23168502	0.1812598	0.18136073	0.3088724	0.2559487	0.35275153	0.1845478	0.24742917	0.15023499	0.19702071	0.39287567	0.16067822	0.2247323	0.36983373	0.3573197	0.38170464	0.3322344	0.2524429	0.3093325	0.23695647
PHGDH***	34.05119751	29.66507432	16.50956	26.91965803	18.61937	15.99186951	13.59292235	27.75807	30.16605	8.659874	23.83411305	31.95200041	29.00422	22.09874639	34.93544	22.86303	28.19397982	11.19139251	29.38723	22.00559	24.76391213	32.43460834	23.52417129	27.57088523	33.00384657	10.25577952	46.53944158	17.87198	4.95258387	27.96987177	28.05995	18.9195472	11.43083553	17.64859	24.02459255	28.12956268	38.96246411	33.1117874	28.13936542	38.63667279	19.82653646	22.8205774	11.35394652	21.65433	15.8997935	22.40458716	12.13875	4.2359811	29.51473179
GMPS***	1.68911089	1.55002289	2.785583	2.4202693	2.358493	2.04834479	1.76098578	1.09678	2.580499	2.311736	2.16704243	1.83442331	1.981281	2.27414031	2.673278	2.585225	2.06802062	2.6147586	1.595404	2.097234	1.48022269	3.00524116	2.1132387	1.6701686	2.20932689	2.45404405	3.45748085	1.682228	2.38813244	1.78158868	1.875526	2.07042924	2.76633559	2.088006	2.13580388	2.50636109	2.56703844	1.13696628	1.47772466	2.44104614	1.61160992	1.66519549	2.36042781	2.122516	2.08205864	2.67375622	1.680515	2.66578744	1.82722853
PSMC6***	2.19740173	4.43061455	3.871241	4.58045135	3.195995	3.73436628	4.07350654	2.874572	3.5815	4.801288	4.14988061	3.64098035	3.752317	3.85007201	3.954975	3.575213	4.77635836	3.7873578	3.624892	4.095784	4.36796334	5.26465936	3.94270693	3.86970562	4.48103744	3.86603961	5.52463089	3.978896	5.20909819	3.74389971	3.054819	4.22612781	4.78338824	4.418794	4.46468242	4.52859094	4.03814162	3.87668481	3.23645424	5.18303088	2.99830813	3.6770559	4.5953387	5.377839	3.82157446	4.85812267	4.280392	6.497494	3.42046596
PDAP1***	15.94766536	15.83180329	12.89416	16.1826793	13.45649	14.71361238	14.06393836	15.49767	15.9583	17.69763	12.62897759	12.47482976	14.62924	12.30572231	14.37592	13.5544	14.73783994	11.43175756	12.94265	13.72199	14.50885355	18.26646264	13.5555887	13.75899623	19.78867935	13.04322511	26.36798137	14.44815	14.99676587	14.19224967	13.8154	13.26214143	19.6264541	16.45316	12.61523682	14.16663088	14.40422426	20.5376685	13.05278954	16.57085801	12.77916183	13.95472346	16.84299903	13.08261	15.05045092	14.02906681	15.19887	17.06766762	16.30803888
TMEM97***	21.46642448	26.74867722	17.66136	16.94025014	18.28686	8.94833355	8.38493136	14.44219	15.10599	13.77447	20.7051492	37.07742186	11.82936	23.30201213	20.11213	15.01093	17.01663866	8.69553379	19.79051	20.18453	14.87509732	19.39474927	23.87416432	17.14667021	19.467147	6.38101614	19.31567847	13.93292	11.56913056	15.10215885	8.715866	10.83368881	9.9706472	14.44801	20.84722113	27.53476484	34.85392705	10.34848734	96.79481009	30.74250387	13.9365919	24.51474345	14.35250474	17.89704	16.31176754	7.44495062	13.67252	11.63288451	18.50428638
ACLY***	6.62465439	4.13345324	4.680026	6.22002485	6.952297	6.38077827	4.63730663	1.643762	5.722411	7.464625	7.1753405	3.99939454	4.803276	5.88053539	6.270971	6.088627	7.94120893	5.8764446	3.599076	4.778151	3.74925009	7.63268107	6.78293739	2.3353422	4.62102225	5.93212005	8.27161646	2.976208	8.48898168	6.37330493	3.497892	6.13079023	12.09491862	7.547966	7.27208494	7.18475451	12.21938469	2.69753784	5.4640107	6.80859661	6.04912644	3.94617704	8.16525742	3.978387	8.18157342	5.62361722	5.221429	9.25962903	3.22203288
HSPE1***	41.41487501	50.06697596	29.6303	42.89118277	32.6207	32.98571416	61.23616987	40.66243	39.34603	42.30676	31.85825601	28.95226945	43.07234	43.39265909	37.69455	37.00642	46.33434489	34.88371917	44.55254	42.76827	56.9620694	51.98763774	45.60396842	43.60691054	47.84917912	29.74251573	60.71988022	47.22927	52.8637679	29.02459828	35.13448	42.75859423	34.14809631	56.42195	32.09026316	38.15684037	32.05244768	57.38173249	38.4405171	49.65161331	31.89703171	46.88185871	33.83220995	47.99639	50.0069718	44.68843988	50.47616	55.80300503	43.23863329
SLC6A6	0.23317125	0.52070462	1.360925	0.50228181	0.28947	0.74379407	0.53383257	0.0555589	0.6278922	0.5418705	0.73059864	0.39913359	0.5630633	0.49065383	0.4522012	0.4173366	1.25290878	0.46002167	0.4206863	0.1996077	0.35305806	0.63528865	0.43050358	0.35171245	0.61969482	0.357901	0.72894379	0.4154258	0.92522209	0.3196312	0.1368002	0.55086957	1.28182592	0.3979266	0.41508706	0.96872571	0.67928567	0.22508227	0.23871556	0.28465027	0.52384577	0.14763775	2.56858155	0.311859	0.56069731	0.44262085	0.2759865	0.61616769	0.25090084
NUPR1***	11.48573858	22.0259673	4.767751	18.03804327	10.63089	10.98351703	13.51816617	25.79025	8.557322	15.26819	10.44981147	19.06544992	15.67975	17.64437776	15.23949	9.729749	18.49367468	2.47602569	17.36699	16.31882	17.20948464	19.05090206	17.17201372	24.97501516	25.97264433	6.82411102	23.39604673	19.29493	13.14158624	21.48431751	12.19381	9.92209709	11.05007689	10.64859	15.55121241	10.25981968	15.29971102	26.77546156	16.62957734	15.84644242	17.17067353	17.76269895	11.44564244	13.25651	15.30876524	6.05315452	20.87354	19.87604238	14.70870487
SQSTM1***	37.21989652	34.76314736	18.25899	23.82273424	21.69268	22.81529958	14.66137249	18.61833	31.33754	30.97044	20.60851322	24.24961308	20.2979	38.97539456	18.80036	25.65096	40.14328065	30.37130024	27.79299	22.02059	26.78695829	46.7614274	27.66001503	22.5532357	38.8909632	30.70885266	74.25306354	20.06771	28.41833332	19.79923881	42.96756	22.63521227	43.88206481	34.31311	34.82606639	34.47629154	58.89858896	22.38242218	20.15160456	42.70101917	25.73643035	23.95471958	25.68697323	25.39993	35.99271041	32.90829471	21.09609	43.56598347	19.75549104
ELOVL5***	13.62276554	12.3596546	12.5923	24.43352445	30.00564	15.19210133	11.3596403	4.937015	9.376588	34.21087	17.93723111	11.0905823	14.895	20.71701522	16.63725	37.1117	22.97051476	20.62430615	16.60548	11.36831	10.74772203	13.1607046	24.06977173	8.35057183	10.08367842	15.58258437	12.65692571	7.263352	32.18208685	17.55201603	12.63812	18.62888654	14.33463282	17.97563	21.32480541	15.21511272	21.08014194	5.72501734	20.29320602	16.1201257	13.94634347	11.0089837	15.84102327	16.59989	20.00813659	17.53836188	13.12333	18.50831304	12.83281437
DHFR	1.81107372	2.68705909	2.615139	3.16366539	3.100441	3.04480626	2.13451883	1.367741	1.283802	3.204807	5.03224719	3.88461776	4.216397	1.92597755	5.024827	4.106945	3.09870199	1.77980773	2.605748	2.567192	3.5400774	1.8387642	2.79455104	2.19944905	1.50158693	3.33414343	2.03253172	2.47272	3.37452655	4.6198079	2.176858	2.95998629	2.51663239	2.635978	3.62077277	1.96944637	2.31781129	0.80060675	3.7547499	2.18598694	3.78262713	2.38995763	1.64114426	4.363323	5.64014951	2.16619346	2.453091	2.28872047	3.57594004
BCAT1***	0.05738054	0.17932696	0.07726423	0.17439864	0.09979264	0.0764694	0.1440333	0.005841823	0.1866022	0.1282258	0.10736532	0.09653343	0.1530447	0.06287018	0.08765046	0.08154966	0.25112321	0.10151659	0.1189273	0.06716176	0.07515265	0.09727181	0.07321119	0.02098232	0.14916844	0.1030401	0.11269184	0.04480058	0.34777805	0.05271859	0.0464002	0.10611665	0.61469834	0.05364178	0.15175399	0.37025348	0.09163899	0.16961072	0.02658578	0.20060595	0.09776201	0.02191566	0.64086151	0.05062451	0.13137684	0.0803229	0.05527431	0.22898572	0.02439151
ERO1A***	3.38527781	4.40672722	6.41533	6.85551589	5.692629	6.51053205	5.94999157	4.006831	4.119732	7.337105	5.87560561	4.57906888	6.423689	5.1289277	5.990166	4.787868	6.23458002	7.70597557	4.742337	3.819864	4.47935092	5.86591467	6.01973543	4.36777591	4.89703655	6.6510823	5.53893738	4.622034	7.9935519	5.42282115	4.249002	5.91358755	7.7600699	6.783026	6.58563862	5.25593227	4.82694442	3.60588173	5.79419549	6.08827033	4.97332343	4.97636654	6.3079726	4.917991	4.68652247	4.91146454	4.724831	9.87813307	4.3878978
MCM4***	1.8482185	1.43763402	1.150919	0.91982273	1.314421	1.23553235	1.37424366	0.7560171	1.01496	2.780325	1.50247336	1.1575279	1.503882	1.03698161	3.5739	1.88515	1.70779067	1.79497385	0.8313196	1.067149	1.28112889	1.1067292	1.15235718	0.77615679	1.03240549	1.37600604	1.79269562	0.9405398	4.32118781	1.64309827	1.371777	1.61490383	1.90866234	1.636996	1.432632	1.07364084	1.33941689	0.80313535	1.05511345	1.60118021	1.83914382	0.93489741	1.70421391	0.9529526	2.21404825	1.90234434	0.9425525	2.84865794	0.79746109
GAPDH***	372.9078131	336.8397485	237.3296	345.2381351	224.0468	259.3099958	288.4941368	178.1721	226.9411	358.3588	213.4935734	196.1412953	261.8629	176.7438082	338.9359	272.352	280.3002199	277.1469475	335.4362	190.6662	314.6859553	266.52627	278.48557	266.4608103	254.2766275	320.2933752	454.6471094	235.4317	400.7894561	248.6767829	296.8795	265.3298972	328.0327312	324.0765	206.6946459	190.8663245	202.2733596	453.1769134	213.0183821	306.8355629	303.2592856	244.7880629	214.6003243	237.0708	326.0764074	263.4392777	303.2473	312.8315343	217.8200059
TES***	1.30596187	2.73748551	1.21033	2.38542074	1.592369	2.30780687	1.54230546	0.8143065	2.215321	2.62914	2.11492123	0.86425935	1.919109	1.46004029	1.8994	1.595426	2.85589274	3.00318037	0.964874	1.231822	1.37957215	4.36540626	2.68718821	0.87310396	2.05644705	1.57763145	2.23394505	1.405095	3.56859023	1.26001508	2.280765	4.8698008	7.96486098	3.423799	1.62514761	2.5571407	3.03031481	1.68745569	1.09282688	2.69162277	1.46943858	0.92785254	4.56426174	1.570027	2.35538265	2.6821125	1.76221	5.22844202	1.26087045
SLA*	0.82037092	1.47789032	0.8557821	1.67170934	1.302714	1.61491736	1.44349205	0.06605231	2.573753	0.816924	0.71678688	0.44651608	1.88279	0.46757122	0.6609029	2.828066	1.50321118	2.54670346	0.565068	0.5609089	0.53341558	0.53195023	0.52860707	0.45089605	1.30919225	1.5150299	1.69468004	0.2210405	2.17799197	0.88395706	0.6414887	1.0589491	3.83856888	1.70376	0.88564232	1.12989636	0.96688245	1.07645587	0.31345989	1.21901155	0.69484222	0.47869661	8.85657022	1.883956	1.16304072	1.42785677	0.8146402	1.54542318	0.46316857
NFKBIB***	8.3254421	10.25184705	9.203641	9.21970762	7.474733	5.20118453	9.95925309	9.491329	15.90833	7.354878	7.20239284	5.76978653	8.015506	6.62384257	7.780843	8.381799	7.83831158	13.94200841	9.093867	7.358732	9.6703868	9.9339398	5.38313623	7.79392547	12.77369876	8.51205653	15.26772049	5.720171	7.42252982	6.06003614	8.31455	8.80419473	10.67472698	12.91374	7.97486385	11.66054124	7.61099079	13.6699124	7.95534486	13.09374266	5.6177708	5.87894962	10.82350015	8.149672	10.75018992	10.23813006	10.38686	11.04622375	9.39241098
ME1***	5.91577741	2.78274251	1.76803	2.6723439	1.481459	2.71966357	1.48467502	1.149519	1.565753	4.816998	3.45027744	1.22875794	3.01621	1.52433339	1.560186	1.808605	3.73388109	2.46134362	1.657428	2.258005	1.85567675	1.8156632	6.85477918	0.96195532	1.12798658	2.57161688	3.79076693	1.324946	7.14808221	3.67144176	1.458695	1.98719511	2.3341148	2.227053	3.21115225	2.21632946	3.35788696	3.53406368	2.09219155	2.2220768	1.38259991	1.59483397	3.34813087	1.591496	5.32327584	1.53488401	6.155677	4.36806328	1.69055232
CORO1A	2.61447128	4.4846075	2.187948	4.81244064	1.318754	5.42800585	2.00033689	0.3812896	3.329212	3.824899	1.62472981	3.52012841	5.814297	1.88187459	2.867683	2.656636	9.71291588	2.89864195	3.834193	2.015904	3.27948595	1.6019033	1.2690646	2.34589166	5.13154447	1.63891271	6.93358894	1.151585	8.81931457	2.90723038	1.136619	0.93345873	7.19059702	2.556389	3.67754797	3.38332149	4.87355386	5.24910122	1.79193245	2.84739249	2.49584123	2.43405474	22.21523355	2.308496	3.3267153	1.62950519	2.750966	7.38167504	2.18164063
DDX39A***	2.91120668	4.62296322	2.649675	3.27424835	3.284451	3.12648329	2.97474107	2.00033	4.869904	2.38141	2.5218688	2.31791433	2.968922	3.0505473	2.949128	3.282591	4.16318873	3.54505618	2.221568	3.144955	2.58261313	6.99081761	2.95676674	2.27201704	4.47860683	2.39032734	7.0957927	3.223775	3.65220982	2.6976447	2.992662	3.31271984	5.9730415	4.046392	2.9420218	4.00433793	3.88995448	3.91281049	2.17713846	4.14478918	2.88810553	2.17287489	7.67341063	3.295222	3.43433691	4.49140103	3.18548	5.5500327	2.0863668
HSPA9***	58.12218698	47.06434569	57.15108	66.52734517	51.05275	51.59639661	55.95070999	29.65685	46.06197	79.08973	59.02296678	52.36756508	52.72008	52.73558822	64.60811	60.19491	55.37941441	64.43953354	50.4448	48.46974	58.31551573	72.53146169	57.82010986	43.56235476	50.2430261	60.54290755	94.0699735	40.36119	72.0470386	53.16192164	53.66257	59.97546596	53.14105517	59.15389	56.56274007	57.75456393	60.85491331	34.83185031	48.40654172	82.12358184	49.86567224	45.58347308	41.36871364	43.9598	66.40226928	65.32370307	54.64016	73.17322156	63.54516988
CD9*	5.21945672	8.99489793	6.196527	4.95043548	6.38167	6.92273651	8.01883951	2.668929	25.75084	4.809869	14.98754308	6.90274437	11.36214	13.25281406	7.084069	4.476968	9.47132616	15.90456967	7.081936	7.19154	7.3257161	12.31977442	8.72520544	9.47844452	10.27982933	7.95251704	21.18578397	7.936623	4.85980635	3.62220573	6.464487	13.57217181	22.65803559	11.59163	6.91163278	12.50246222	15.14205133	9.51018119	10.14782537	10.90870653	10.91921779	8.52193544	17.76946176	8.237922	6.19363259	13.20476908	13.90884	10.98719582	4.43088192
ACTR3***	2.39426165	4.64332251	4.781609	5.44902386	3.431195	4.44759403	4.62569148	2.513853	5.286422	5.11406	5.07201566	3.71596615	4.360982	5.73022862	4.093947	5.144767	5.14316464	7.0064226	3.818752	3.985927	3.56075042	5.72586778	4.91924667	3.81652445	4.61357879	4.89328656	6.31507817	3.188774	6.68453591	3.36488324	3.559585	5.85348693	7.07074162	4.557713	5.167319	5.66472486	5.35223287	2.91418115	2.90683867	7.18129375	3.46969165	3.6278505	8.92799323	5.693925	4.54605007	5.09610404	3.852707	6.10633827	3.64076311
NFIL3***	27.3974261	29.81774517	38.19384	47.47095717	53.38954	38.78884068	45.98246364	38.20426	77.84615	17.09274	61.24677928	12.575889	5.731787	40.67505179	30.19527	50.66784	24.66326932	44.99496007	9.135675	20.60045	7.18592452	45.03736175	46.02503265	44.95489546	14.96000558	51.77375623	16.09370915	14.08425	27.86856511	29.4563932	45.98004	55.34294068	55.55312507	39.21787	27.33281705	34.32363248	31.94476568	53.66319104	13.08008062	34.34500014	29.27525374	34.53135425	27.57526753	23.6778	19.89039874	62.75106031	37.29402	12.03366149	50.98947921
ENO1***	152.6528932	95.0802181	64.94721	102.4794553	85.23478	80.56098205	74.21404335	68.19078	125.9502	134.8173	76.33271523	64.36367564	93.82179	90.66391768	101.6281	107.9881	98.67958882	97.85142068	124.8434	81.02109	93.03936333	130.0231317	72.48569027	61.13857063	114.1572584	82.13131037	233.9862759	73.87331	108.9003605	87.9366222	147.5694	131.2417174	135.3107904	134.4925	99.2292891	101.6898779	130.6461013	118.690069	77.69196331	109.7793177	89.78466731	77.37650025	102.3762208	78.30894	101.3394506	170.6218451	83.47766	111.6563885	100.6965233
IDH1	41.24808603	66.3903264	52.45266	74.99724226	59.88956	56.43238821	46.60313676	50.25861	33.04977	57.42233	73.9978294	68.99524826	42.61203	52.95540014	55.88174	42.57822	68.00702426	21.74542245	52.46943	45.8323	52.9334993	36.16827803	103.5350611	61.44942102	54.13972451	52.01829794	40.7633083	44.08535	70.36813595	56.09665899	39.62988	41.21922102	44.22311918	55.86771	55.02653969	68.15336556	65.23476301	38.07841167	59.44069657	39.05912263	54.66079617	49.72980897	49.08743167	80.67848	52.48290561	33.51559672	46.66689	56.5077139	80.39409259
ASNS***	0.26655811	0.50334017	0.2625646	0.5783651	0.2725537	0.29398704	0.46280457	0.06690888	0.3377401	0.3644916	0.15891514	0.30704163	0.191611	0.17594685	0.2221481	0.1676451	0.76312718	0.45456268	0.1475457	0.2995567	0.25685663	2.38218191	0.28317706	0.16290879	0.52424479	0.09867574	4.13733567	0.1342006	0.51106732	0.13934038	0.2575445	0.56874436	0.8316446	0.2997644	0.24198633	0.6131578	0.80736935	0.85489327	0.26040796	1.14266905	0.32771991	0.0707975	1.041247	0.0790669	0.43694596	0.28723112	0.3523477	1.46777724	0.07125537
TUBG1***	6.28414402	3.55748873	3.342226	4.34708568	3.939605	3.57622251	2.79306775	3.699478	3.100537	7.739349	4.18961883	3.26024008	6.050408	3.05243343	7.91642	3.28737	5.27964641	3.49971782	3.348635	4.612627	3.62605706	3.79307672	4.7266844	2.65794045	3.85874683	4.10609776	8.69285845	5.010521	8.04656783	5.3907887	2.94596	2.5553071	6.61413437	4.318915	5.97204512	4.41937754	4.63348493	4.18030796	4.04035833	4.41665513	4.27381817	4.33484207	4.36286513	3.742365	6.6461847	3.40750597	4.525671	9.328391	4.94054689
CANX***	50.27151638	32.41891152	71.0611	81.22701575	65.90189	69.1134921	66.46149271	34.0977	48.50539	100.61	51.77956084	51.06436316	65.71322	58.90872082	81.86516	58.39148	66.73037577	97.32024681	58.01737	53.59663	59.05437501	55.63556144	61.74228466	34.54625519	48.92147477	66.8559282	61.42398323	38.05921	111.2840885	71.68997544	46.62701	66.52880805	67.38910864	51.04286	65.22462832	50.40880231	59.33692807	35.75613209	54.52896235	71.89454731	62.6965369	52.48053608	55.80160171	49.52393	71.76358591	58.24988233	64.70479	75.2975611	56.44314326
LGMN	17.69653689	19.96134624	25.33864	26.8807991	12.2358	24.2204955	15.74461751	5.774925	61.9526	29.02857	19.59729655	20.58508478	20.54095	17.75268326	18.09421	25.81253	21.10929195	32.66345857	21.78422	13.38248	17.58950766	18.65384661	11.90694542	23.70310716	39.7816829	40.04772325	34.22879858	7.896893	26.06669421	20.17991945	13.51309	17.18090466	41.04145075	22.57333	21.97178322	32.90938332	23.52919564	21.62662608	14.5606818	17.20624851	14.87010408	19.16435176	47.08647793	18.9301	19.96688343	23.59641912	15.46054	34.57276077	18.22177337
HSPA4***	7.59650244	10.06084852	10.868	10.50187993	9.028684	10.82747975	9.57783162	5.798996	10.99195	13.98426	9.61655732	7.27511181	10.66206	11.36812548	11.14928	11.35465	10.88733565	12.48653299	8.802056	8.723515	8.32403784	14.30053366	11.11240668	7.005057	11.7772059	12.53321631	14.3804113	7.103947	13.91601561	7.592468	9.452196	10.46116518	12.88991591	10.85738	10.09056327	12.9536394	13.32828143	8.43157473	6.44295423	12.49944329	10.16122149	6.41471916	10.04221428	9.196535	11.2861842	11.34433101	8.260805	20.23203965	7.76338439
TFRC***	0.43871904	2.34558627	2.375323	7.8504233	9.058393	3.06864351	4.96059469	4.91609	2.134849	2.351416	6.29628796	3.62744839	1.298786	1.4990451	3.594138	7.206478	2.99533171	4.3827735	5.498743	1.238753	2.17436122	6.80960768	3.03378605	3.17173967	3.76392493	3.12575024	2.03046066	1.152662	5.45882441	3.32536689	1.406258	2.85170843	4.88160276	4.06604	5.45623895	2.92672457	9.62792415	1.36622396	1.44290605	7.09664424	1.33851484	1.86681622	5.14218869	2.126561	4.11732183	8.62477146	1.155315	3.5885823	2.20793689
IFI30***	0.09077736	0.31633743	0.1646415	0.33576841	0.055256	0.17596564	0.18095086	0.06469331	0.2310332	0.1263067	0.0917214	0.17860257	0.160564	0.03510427	0.1367656	0.2273094	0.35054364	0.19839023	0.1151913	0.1195329	0.19063918	0.74298218	0.16949534	0.11203149	0.29563326	0.07087472	0.13187918	0.1134009	0.40786509	0.0938273	0.1614936	0.16088406	0.50804352	0.218218	0.15476126	0.18957873	0.23025445	0.13104397	0.09648904	0.20874699	0.13580059	0.02311406	0.921689	0.1965825	0.1350968	0.33636892	0.1080206	0.34490695	0.09139249
ATP6V1D***	6.05900284	4.31227015	4.245399	6.37565421	4.602381	4.76263676	5.87883854	3.802648	6.258697	6.138535	5.29958105	4.29185957	5.796604	4.87609946	6.086284	4.567945	5.7656299	4.77369003	4.71274	5.317466	5.96868098	6.68539897	4.53063314	5.38696813	5.60753911	6.04747899	6.62355007	4.612189	7.36812008	4.00661976	4.8497	5.51947213	7.4037177	6.5462	5.70423912	4.87256231	5.93275198	4.48505538	4.55274192	6.11232322	4.46480791	5.03176882	6.30522526	5.972382	5.73151175	5.40081933	4.849868	7.98731851	5.20945796
AURKA***	0.80415245	0.22337009	0.3360842	0.76089532	0.5217131	0.41934947	1.49351068	0.2349299	1.239831	1.060512	1.25213706	0.34215186	0.7903953	0.19334324	1.511352	0.3331589	0.52384986	0.49470368	0.2928173	0.7202457	0.60966605	0.20170228	0.25133415	0.37971328	0.41530383	1.3992746	0.4159434	0.6005543	2.44619151	0.63602601	0.4229581	0.42082277	0.68486027	1.078606	0.48923367	0.3521655	0.16619877	0.49174095	0.50313014	0.54789303	0.50822027	0.3476404	0.63036269	1.203016	0.89376523	0.31668613	0.5818677	1.24069285	0.45431557
PGM1***	63.42064409	44.88416012	57.77581	62.71375749	59.77283	56.8996331	36.03952757	47.08046	64.04629	71.61675	61.05689288	70.33187846	69.92737	49.15257103	89.19126	53.11602	60.80738964	48.36789298	80.38795	44.06523	62.28627541	41.00878564	59.78243377	72.26250056	53.88441708	66.96973993	69.31391499	43.06202	46.91541736	72.89013607	72.32733	48.57985404	38.41509735	47.9802	72.0227923	73.96630114	75.687079	49.1711473	72.73527345	38.75380296	55.96819769	64.78062307	34.28867526	71.40259	56.13884634	55.28174658	49.94443	45.91810118	89.94024384
INSIG1	135.9613715	113.3221274	60.81859	194.6434872	367.144	112.6561869	168.7928979	72.25511	110.0518	91.26272	282.8854353	41.36072972	126.4875	153.7084365	120.0928	228.3422	85.66587066	50.71168153	75.02958	162.2916	50.76704408	82.73082957	251.8960044	77.65257911	83.67965253	115.2018093	13.08769023	36.66191	172.4151226	145.8895556	177.8098	115.1197291	34.41793051	313.6158	166.9448728	60.94657829	192.8956104	114.9309027	165.100433	84.09969209	91.23797317	98.1951654	100.7629315	178.1778	82.07376773	179.5830037	161.4917	23.39998843	72.5831749
UNG***	18.91909841	7.02472782	8.845938	9.63747299	7.926799	6.54771101	7.22872966	7.324468	5.889354	7.124748	9.85476254	8.08307231	11.39499	6.79412229	13.54331	6.67395	9.74511073	7.26434806	11.18888	11.18699	9.03430903	7.20879387	8.0597906	7.2666698	7.61693124	7.50077868	9.94195401	7.302216	10.94522978	9.49157946	6.583876	7.08512264	8.22091501	7.494236	11.94310239	8.66101985	8.04442471	5.23803568	9.69149781	8.81810491	9.5594466	9.91323612	8.19545603	8.972059	12.3941793	5.98906148	7.144057	10.39051347	11.80686307
ACTR2***	12.1047299	18.64781555	23.39784	23.74502992	19.4086	22.53406112	20.74692314	8.571401	17.20217	25.85996	25.27290008	16.34068006	21.27358	21.92869711	19.85584	25.02819	22.97880314	28.91866807	16.42288	17.57854	14.16221298	21.21477545	19.38135923	11.38499263	15.70514238	22.62420252	25.07278028	13.41773	33.8992115	20.27791973	15.40925	23.08343339	27.14640373	23.00768	25.58120578	23.39614049	21.73702581	11.23480115	13.86493336	24.08079516	17.23230499	13.31740588	33.13697292	20.48845	24.34440158	23.38300226	17.02903	25.30843697	15.90569089
FGL2***	1.68177592	6.54751242	8.31836	8.84313422	2.950745	6.17945877	4.84265918	0.3174889	11.51835	5.709613	5.30494547	4.88313635	6.023402	3.98574748	4.476027	9.228916	9.9975187	7.76585688	5.452875	4.172071	3.84207121	2.62504299	2.40803512	4.08057361	6.04736511	9.59465854	7.57211732	1.304064	14.70907749	4.69832311	2.137066	4.24800219	10.85093105	5.400011	6.42906853	9.35713888	5.28324969	5.27569379	2.6362083	7.13258923	3.77563736	3.08868848	19.86793841	9.92637	7.09160539	7.49465633	2.798864	6.08157879	3.27443358
CACYBP***	2.53263726	2.81271031	4.132418	3.92958251	2.752483	2.95176415	3.69333373	3.314079	4.341411	3.83333	4.19820779	3.85230212	4.318701	4.52265516	4.400343	3.081517	4.83039402	2.98656294	4.631174	4.328	3.26047917	4.4552786	3.75678848	4.76155344	4.45424766	2.92742118	6.03225211	3.640805	3.60316053	3.10483902	3.040057	3.05079003	3.48849523	3.488508	3.48324864	4.6358356	3.60213044	3.41315852	3.33511375	4.18351081	3.15560271	3.09866588	4.0589707	4.925384	3.52361733	3.09976399	3.734351	4.15897334	4.48362523
HSPD1***	57.64670784	53.13217969	75.05994	68.474285	57.99169	69.36795663	74.28852047	47.3113	65.36474	81.65187	61.39465858	64.83196421	64.27729	68.50549799	84.36589	72.09529	79.75637831	87.3332557	69.43444	68.78232	79.12581891	85.87365554	79.34366105	70.74796334	60.14231173	78.80290782	119.2425435	62.77301	88.93350099	60.73261812	73.13576	70.91426497	66.33623686	70.39247	69.49735086	81.71053386	70.99958357	61.1398623	65.26867322	105.7435707	58.89177501	71.47308025	48.44301511	62.74439	86.24907086	72.14037509	73.94214	113.056882	74.3388112
UBE2D3	12.11709924	13.78707299	16.16436	17.17196636	15.23915	13.74716613	12.80616575	9.12703	19.44753	14.81122	15.14837088	13.2482144	13.28373	15.97380837	13.6467	17.84114	14.76208428	16.13428889	14.53784	11.97424	13.13590154	21.50458535	13.72352705	14.34055886	15.95283337	14.90511342	20.96469729	10.67558	15.11551125	12.49968928	14.62899	17.53891469	17.84030941	12.96547	16.43832099	17.5583854	16.33117729	11.75096696	11.41194501	17.51683027	11.4883607	13.33412133	16.64185828	19.44512	15.18565234	20.9081762	13.18455	17.78592085	14.41522345
HPRT1**	8.67389246	14.69375958	18.44131	6.71615198	8.332977	14.18048489	13.4534292	15.57319	43.76599	5.63092	12.21411101	20.32160322	8.12978	20.23158588	5.902499	10.97163	9.21109538	10.30480851	16.79718	10.5306	9.04726862	34.61384532	11.38039612	24.2940119	32.17352822	7.51435219	17.72962963	14.84481	6.91250802	5.66196309	7.625747	11.338127	14.14696735	11.39027	8.34780569	32.19250986	13.23666951	11.19673746	10.77206591	15.26853607	8.76534717	18.6533326	22.16709057	17.46867	6.58856076	14.53692295	11.94067	11.0752108	11.52340001
SLC2A1***	0.55268885	0.56890107	0.8328236	0.74315155	0.7949789	0.66455869	1.37352163	0.2745728	1.056729	0.9482473	0.4900899	0.27762746	0.3272592	0.76010326	0.3558208	0.4300062	0.91467849	0.78492673	0.7018581	0.1972928	0.97235378	0.86449469	0.55050552	0.54219799	1.48866677	1.0492594	1.03670279	0.2426888	1.13601489	0.3622263	0.2846215	1.919667	1.40704443	1.153783	0.52752832	0.86283612	0.54966546	0.64102077	0.30647335	0.32816369	0.40459729	0.29679773	1.29953097	0.4619509	0.30351064	0.31241051	0.1554113	0.91099306	0.30066961
SLC1A4***	0.97075722	1.24415115	2.648998	1.6779373	1.052738	2.50482393	1.25801574	0.9549685	2.065115	2.245695	1.24254587	2.35998188	0.8775335	5.18056226	2.412388	1.379448	1.82077407	2.98730514	1.925446	1.676292	1.05541089	3.96152376	2.11501311	1.51100968	2.33657033	1.33799699	5.16059586	1.809359	1.70210771	1.96811508	1.842467	1.72819649	2.91187367	1.261365	1.20245058	2.44018066	2.79299159	2.2891538	1.18358484	2.36105559	1.26242299	1.99376234	2.03846911	1.202688	1.52154746	1.09843672	2.069044	1.33324686	0.77988786
TM7SF2***	32.78430549	40.65740225	9.185468	22.99413544	21.08416	12.77014301	16.35903286	42.87779	20.37208	19.80276	11.81131949	54.16805103	26.03851	25.59399441	34.74381	12.89847	20.97224954	7.82379993	39.4638	23.00205	32.94552551	15.17105884	30.86019246	21.64009148	42.41512028	10.71139077	14.80109725	15.94345	16.40499093	17.95299128	23.2033	20.82742984	8.94930025	35.72258	25.67897806	24.25295112	63.15064751	20.24504859	126.778432	23.32497948	20.95871772	22.7078625	10.95140269	24.8456	23.28992315	16.62423763	20.2662	14.93273843	30.8757891
CDC25A***	0.14422108	0.06808296	0.1398055	0.09411249	0.09513872	0.14580636	0.28674849	0.1336652	0.09861839	0.1591502	0.24873053	0.04679568	0.1290128	0.17981452	0.5116791	0.0481288	0.14979244	0.20153484	0.02776679	0.268124	0.11117768	0.03912277	0.09703474	0.04875923	0.14064906	0.12813226	0.17219251	0.2050141	0.58758931	0.22617005	0.03981266	0.08009118	0.22729975	0.1271198	0.15782925	0.11424455	0.17473065	0.10153304	0.1207659	0.12579579	0.14321405	0.07660988	0.07934732	0.2106048	0.20039994	0.09009055	0.09764359	0.36863776	0.06609029
MLLT11***	0.36678103	0.40812242	0.2460421	0.37557582	0.4709845	0.24774721	0.74262135	0.05626787	0.6505568	1.111552	0.50879306	0.18438417	0.3398215	0.27250174	0.5932814	0.3628162	0.36863975	0.59703182	0.1893576	0.3638787	0.32199421	0.3513422	0.25798646	0.17810028	0.32682701	0.29342654	0.50405896	0.1898665	0.9700089	0.59029457	0.2547456	0.45142978	1.5606315	0.3985758	0.31528791	0.25747994	0.24922102	0.34763058	0.28921032	0.20458767	0.35828029	0.15479895	0.77760178	0.2526708	0.7434277	0.2503025	0.4039951	0.74091234	0.15209056
SLC7A5*	2.89532902	1.26414495	4.480357	3.0335471	0.8708722	1.60436303	4.33818517	3.107154	3.40755	2.329463	1.55597127	4.37692569	2.434651	0.35791928	2.791873	1.712117	2.20944645	0.88616371	1.788821	1.62152	4.49519129	1.87828315	1.06348056	4.23059543	3.36000783	2.44212168	2.02651567	2.338388	1.76271776	1.67618657	1.588999	2.6077459	4.51988399	1.977712	2.35600028	0.95311831	3.44232702	2.56944215	2.54194708	1.90341264	3.92305592	3.04858221	4.35449142	1.473271	3.30909747	1.62587526	1.315184	2.12325037	3.23033644
IFRD1***	0.38821842	1.00057259	1.256977	1.91686939	0.928352	0.94729267	1.11678047	0.4929355	2.733045	0.6618899	2.76343843	1.13963696	1.015725	0.89547527	0.9382635	1.459277	1.59203893	1.27128765	0.4789238	1.392585	0.87603579	3.85937192	1.47116704	1.38766807	1.6623878	0.68091401	2.02671721	0.9509431	1.32375324	1.36768099	1.770382	1.17488697	1.9737897	2.173596	1.23640111	1.72229967	1.01706735	1.15974772	0.88519732	1.83007561	0.8885292	1.06437318	2.14394094	1.671542	1.24283036	2.11477491	0.9815506	1.54146989	1.01327168
PSMD13***	13.20293033	13.95901838	10.04499	11.60676513	10.64874	10.16558718	9.34788368	12.80897	13.90297	10.56568	10.37477384	9.08526887	9.160427	9.71970723	10.44271	9.413154	13.94848424	9.2839027	10.88723	11.02522	10.46277753	16.91663475	9.58890281	10.10657033	16.27711229	8.98197649	19.58440466	11.53838	12.39153306	8.95266319	8.607471	9.6474532	15.61237602	12.44752	10.50505458	12.7014581	10.38584288	22.652887	8.70703282	12.90732075	9.27646678	11.83730668	15.60382262	11.35663	12.61010641	11.18855084	10.43678	15.20059302	10.67052861
TCEA1***	5.32959752	6.38771178	6.976921	7.97688139	6.395785	6.22642762	7.18335866	4.214035	7.772462	7.16901	8.40706409	6.94550946	7.810711	7.28425382	7.019163	6.657753	6.98265427	6.40538957	7.221217	6.397388	6.52195891	8.09438289	6.82348052	7.07201208	7.56069064	6.92788654	13.00274394	5.39821	7.49688092	6.92719381	5.337951	6.18928212	7.111121	6.251177	8.52233985	8.34678109	6.69764933	4.33676783	6.05990522	8.31088417	5.71638235	6.94459646	6.44641493	8.787101	6.84348507	7.28966321	6.661395	7.04138639	7.32578561
GSK3B***	2.33744946	2.41108651	3.52278	2.62792148	2.507359	3.03325611	2.60854126	1.81291	2.547605	3.444452	3.04766107	2.73609712	3.198702	2.47215109	3.249335	2.861448	3.7803544	2.72794028	2.355998	2.586792	2.44505309	2.55504517	2.90727801	2.32994521	2.58690568	2.68394567	2.90619596	2.345735	3.59236485	2.73317998	2.074621	2.76596734	3.89542052	2.520126	3.25939233	4.30449704	3.31400373	1.94635786	2.59910772	3.40801337	2.8055731	2.12916457	3.26020057	2.609383	3.68255351	2.41601058	1.986967	3.28719035	2.72456243
IGFBP5	5.82894867	4.14224273	11.41924	10.93155238	6.666933	5.51050291	11.37485809	2.167628	18.22186	45.63281	8.21884701	8.75962029	8.227374	13.20533438	5.098246	4.975779	9.9976944	5.36587001	13.93014	8.304306	5.58944266	14.64334292	5.63345202	11.56567429	14.26207417	5.82767413	15.51084748	6.250836	3.85092932	7.29939074	4.254762	8.9951344	8.56763332	3.364483	9.04132043	21.65374421	5.5111506	4.7837223	7.7865989	6.29822166	9.2615868	2.58377363	12.99440145	4.647727	9.98369423	5.12711795	3.863029	5.66422575	6.13147141
NAMPT***	7.93047233	32.07619251	33.10433	19.41159281	37.10608	30.46985512	43.13672502	14.19991	55.28284	8.607128	29.90890077	12.08236377	11.45842	67.24279832	7.62294	79.21505	8.07148682	77.32880822	11.83079	15.63081	9.64940157	62.10472716	33.86821439	7.92987688	15.35564431	35.44008246	21.8714731	16.92353	21.77636219	13.48847474	62.19357	72.68213258	22.68776028	38.47846	29.50131977	25.7488771	26.47007944	11.20979832	10.02229238	35.88508127	10.70138019	19.71050102	23.94903425	40.17482	17.14668142	130.4000608	39.3687	15.85293501	13.6496225
PFKL***	21.92180568	11.6921493	10.50664	15.48585684	12.22538	12.88778788	6.63343913	9.86935	8.765503	19.13023	10.24723266	11.9229416	16.07497	6.81059795	15.65871	13.02043	14.16163606	9.99663265	13.01678	7.573321	13.7872788	7.54676227	10.56005999	9.18611756	9.23568575	11.29781972	16.63168243	7.623904	17.1060081	17.01252011	13.55194	10.80815962	12.84170998	13.59866	15.92923335	11.67167579	11.15253995	13.82548659	12.52050011	9.30610711	16.08296429	10.18620277	9.64903806	9.871718	19.32114221	13.16193817	13.65259	17.82956343	16.34919712
SRD5A1***	8.51088358	10.44167447	9.607224	10.83535176	19.91685	6.67376069	8.24148762	8.461349	6.764027	12.20382	10.60868877	10.92018954	12.95777	6.84105996	7.993592	21.33883	4.62595918	2.5482981	8.790394	13.29581	7.51492912	6.72017375	9.57679863	10.24374388	11.50348671	13.23530629	7.98719484	8.341968	8.89236016	9.33354776	11.46547	10.87833228	6.60440418	8.563668	13.2460332	10.92445549	5.41080892	6.75765744	10.05580748	13.10491699	8.79605442	10.44157623	5.41984873	6.595667	9.48095072	9.01656761	6.414014	8.64723412	14.57358042
HSP90B1***	76.06282185	90.06432529	150.7347	164.0304462	138.7444	161.1996547	168.9302861	72.46553	123.1343	197.7138	86.90209914	97.51247064	126.0613	105.3465834	146.4781	114.7118	141.7746619	197.3084298	109.7712	108.3919	148.0294994	125.0883936	128.7522227	113.5266025	121.2122913	134.4982273	126.0859615	102.846	223.2514802	136.5363878	102.4002	140.0760884	171.9170253	97.75128	120.536462	71.06417569	125.6245922	193.9564789	149.1312513	173.6271251	107.7134724	124.3005847	121.4048387	82.54107	188.5690304	122.9090212	218.5823	186.9653275	130.5846084
PLK1***	0.04731484	0.07066325	0.07801289	0.13430901	0.1974888	0.14903939	0.67068398	0.0289023	0.08529662	0.08378792	0.07702221	0.11332813	0.09564447	0.05946523	0.2435562	0.09926525	0.17606583	0.08272372	0.05103387	0.117683	0.1923187	0.07895512	0.07950969	0.05190478	0.17030947	0.06280006	0.09546926	0.2179558	0.48164202	0.1222613	0.03060853	0.08020985	0.15647372	0.07582616	0.08066443	0.12541515	0.10667812	0.0926963	0.23211634	0.10349534	0.09437571	0.08734419	0.29853512	0.1935401	0.20853659	0.04285642	0.06032393	0.3968549	0.04128406
IMMT***	11.25425376	9.25886737	11.80355	14.06077583	10.41123	12.20530702	12.09301463	5.677641	11.22252	17.06701	11.41483127	10.4787291	11.08378	10.06734039	14.63117	12.94386	13.99182398	14.14065114	11.6008	9.29182	11.87740878	12.17195002	11.14594079	10.00260926	10.9098896	14.18720507	17.14672021	8.028926	18.6711139	11.84562546	11.02045	11.96876676	15.04444263	12.3963	13.96012397	12.83014409	12.74459116	12.14743329	11.65116116	15.24301605	10.81230462	10.05281012	11.74006394	10.6316	14.22059144	14.39970081	11.84298	18.77841653	12.35548517
EDEM1*	7.77409932	8.03536261	17.33622	6.81124331	12.80022	15.82310593	12.00182433	6.884176	12.3126	7.941875	7.20597971	11.35192982	10.14438	14.03126037	10.78038	16.23665	11.8349603	21.49200986	9.087926	8.554742	7.89956137	12.42532489	13.5122033	7.37580963	10.32777321	13.33242147	11.78111605	8.089578	10.47681382	13.83003647	9.96571	11.60475864	9.39913324	8.694853	9.90128474	16.14946566	14.44229826	6.5496858	7.82578063	9.75324227	10.68147127	10.58583986	10.42665692	18.55557	9.6790061	18.8991384	12.69577	8.20656454	9.55786129
PLOD2**	2.39662653	6.68666948	5.288919	7.11730522	5.996189	5.74904763	5.36268683	2.791923	7.868351	5.953918	6.4649833	5.01424341	5.974172	12.45009231	5.316133	10.23843	6.00163089	11.93316201	8.324007	6.350203	4.03681467	12.51537386	8.21401436	7.33509776	6.82604036	5.41135136	7.28187491	4.650185	7.83526403	6.05356016	11.53082	16.37169317	12.40134267	9.386795	7.57124759	7.39837954	9.07910376	3.16785849	5.33458769	10.76985391	5.4640646	7.45887702	5.84046394	5.48929	6.55358196	17.88783749	5.06235	5.49024708	4.76264844
PRDX1***	135.5724117	109.0250691	78.96493	123.3409445	98.82225	108.2283863	106.12241	121.3648	119.6193	129.4122	118.0498638	118.4427839	115.9357	93.9318634	122.7287	100.7255	154.3660777	83.97164389	136.4824	125.4182	134.1778861	123.8409101	167.4749981	106.3365165	133.9327692	94.0317452	205.3968614	121.6801	153.1042422	113.2063618	96.80402	87.83289626	130.522669	129.1247	132.5705601	135.0107863	106.4980982	180.5035925	133.5358305	118.9308883	98.63765053	125.9859456	156.7793888	117.4974	143.6936907	109.3334683	118.303	209.5632943	129.4918222
NFYC***	4.37291514	4.63159228	4.161373	4.92946593	2.946683	3.49389707	3.43069741	3.034297	4.042171	3.75582	4.08977741	4.43862269	4.023357	3.17558989	4.009845	2.665093	5.07372059	2.91318922	3.237976	4.604919	3.76403325	5.49163977	3.75610945	4.08944776	4.91768125	3.22817983	7.1535112	4.030927	4.18729568	4.43729815	3.235435	2.18218177	5.18045622	3.411253	4.78955536	5.24400729	3.66112679	3.32957988	3.89655556	5.01897189	3.0168187	4.34253069	4.76442862	3.835718	3.72209126	3.73470019	2.637339	5.00224677	4.49653163
FAM129A***	0.1296159	0.48211716	1.020169	0.6780107	0.3929961	0.3976173	0.21250943	0.1424171	0.5534296	0.8098565	0.63422742	0.63743687	0.5959119	0.48893974	0.4610263	0.4096338	0.98404435	0.55096449	0.7475865	0.4467231	0.23873676	0.42539443	0.73836761	0.29142193	0.45418571	0.35495687	0.5362882	0.4557785	1.0859303	0.28268667	0.2066588	0.74832446	1.09723488	0.3729176	0.37924941	0.74115308	0.56862289	0.2746134	0.40251613	0.53713556	0.60030367	0.16953093	2.47384887	0.2524437	0.30334406	0.34556161	0.2926753	0.74633633	0.2834761
PITPNB**	3.78431482	9.48351917	9.325164	12.29088046	10.98157	9.52258793	7.24226025	7.152788	8.167455	10.26431	10.82566482	7.35472803	9.105649	9.39029283	8.426651	16.23755	7.54101703	11.83115354	6.644652	9.325156	6.41049843	12.60326244	10.07226135	6.85527201	8.50495849	8.62916189	12.15957875	8.495559	13.03671918	9.22095111	12.61601	13.38891269	10.68643741	9.658411	11.62650789	8.6483008	9.15780344	5.34728038	9.11213909	12.31403632	6.56894665	7.97745258	10.49633382	9.387583	8.78693094	14.18093936	7.871349	14.08682683	7.26491007
UCHL5***	1.11578061	2.32844893	2.76513	3.54537695	3.284142	2.58068962	2.67595625	1.800323	2.570808	3.293151	3.54347871	2.57416987	3.294955	2.90268724	3.213503	3.066252	2.77274274	2.69395434	2.239637	2.802414	2.53104617	2.82109559	2.28851151	2.89545864	2.48045178	2.55009167	2.99908497	2.399649	4.55748365	2.5744683	2.485329	3.13688799	2.47144859	2.479007	4.1458907	2.99828326	2.61733203	1.47823057	2.57101693	3.89514949	2.40682139	2.31803096	2.7145092	3.242037	3.69264387	3.52471804	2.546241	3.16802784	2.67105633
SLC9A3R1***	73.90248741	48.1813141	58.63665	64.8725417	53.82089	47.86484465	31.07128232	40.71783	54.53383	87.55567	49.14920055	40.67867808	44.71554	55.60452587	57.89614	41.8744	55.64159595	58.59090768	56.05305	52.05299	48.0983398	74.75554565	64.18575068	35.71929184	68.46072833	60.92501174	89.97590736	46.69885	70.08127859	50.29440942	57.84597	51.58370365	84.0633973	69.37232	57.642247	55.1379476	57.81615882	65.24470847	44.66426451	50.64153978	63.18789902	46.89860483	50.80716309	54.06249	51.5988222	66.20174284	52.12793	84.32649725	58.15374845
MTHFD2**	0.22702643	1.24704595	0.4079417	1.07407089	0.4101846	0.47623863	0.92867467	0.1177061	0.9513988	0.514771	0.45169495	0.28878892	0.4868965	0.61698817	0.319342	0.7542765	0.86044493	1.02224099	0.3227604	0.3247761	0.32895581	1.23107293	0.3842515	0.17756339	0.5271317	0.31412926	0.82861831	0.3682939	1.13957124	0.26289946	0.5123316	1.67486904	2.26271888	0.5410282	0.32143457	0.54976334	0.66471199	0.70097759	0.12856163	0.68475954	0.41509808	0.1295289	2.57917321	0.433975	2.46179835	0.97866548	0.4245219	1.30623133	0.1769261
YKT6***	4.24180065	4.28978011	5.188962	4.07633776	3.428706	4.79909856	4.00994661	3.135981	5.379646	5.194987	2.45888163	4.66183058	4.436618	3.9529306	3.970273	5.119049	5.5069334	4.38545074	5.203885	3.408902	4.15696158	6.20366701	3.91364144	3.76981774	7.46660237	3.85643539	7.73775409	3.367899	5.97982882	3.90383055	3.075468	4.34915701	8.33050219	4.371694	3.6889611	4.8995269	6.90611533	5.79475267	4.19257926	4.05837618	4.98368397	3.83647213	8.27036767	4.14438	4.6634216	4.48745356	3.99174	6.75525966	3.91874334
PSMA4***	4.542067	8.76096812	6.470342	9.08562013	7.045983	6.6030079	8.11642098	7.203872	8.541366	10.3348	8.25650601	5.59853255	8.324231	6.38948508	7.982512	6.960871	8.35162162	7.21444035	7.222358	7.081502	7.42800291	10.45496959	6.63596057	6.87547347	8.70178496	6.4344031	12.41443204	7.623352	10.29216049	5.96160745	5.544844	6.53150128	9.08483963	9.523748	7.419783	7.96940418	7.29152639	11.66122317	5.78284668	10.09130735	5.77106908	6.7112662	9.63535674	7.877714	10.04073477	7.81461862	8.107503	14.75854634	6.84512511
DDIT4***	4.75547767	10.55088319	2.589285	45.39206923	15.60654	24.60748681	43.9518527	9.693084	11.03634	17.12319	18.90197001	2.74289308	8.406303	10.9819306	8.587305	7.946884	5.30163577	8.8901874	3.103693	11.79232	13.03318989	24.37505837	13.66989793	10.48202994	5.0458387	10.33851353	21.60436934	3.255389	23.4555034	26.29865574	14.45108	24.3367687	33.3887021	8.87424	36.31672204	4.49178075	4.28708137	11.90482037	7.2029754	12.98773497	16.71236476	5.05748044	18.97655336	7.149136	7.45418349	12.81398867	16.98481	9.99486408	31.64290463
SERP1***	18.79286037	14.6318545	23.44549	25.7779299	23.02613	18.71112488	25.85387355	29.26889	24.4981	20.13534	20.97291972	18.14275435	24.78543	25.52040682	23.42006	19.9284	20.22056182	30.67830905	19.78697	23.99529	13.46527633	23.0346893	24.56740859	15.40943039	24.78965408	21.19750676	27.22964765	21.72709	20.09201195	19.40216884	20.91204	27.15659744	19.83222158	24.73835	21.95768473	19.28633485	21.12469218	17.56564902	16.4183438	23.86556745	19.05331719	13.99473328	21.02882276	32.08382	20.09409027	35.16703197	25.65474	22.32339268	27.35772107
CTH***	26.58112431	21.73641389	18.9901	44.92558837	24.53312	27.05961043	70.11186279	21.61838	95.54211	32.35866	73.1460387	26.64009051	33.54629	15.22516081	52.35328	79.36079	29.22795755	35.89160937	24.53008	25.15706	65.88947095	20.36523054	22.88112301	34.77255019	37.23620654	105.5623768	23.57633603	16.09824	52.57500487	20.87740894	76.32626	30.2589336	13.40169991	66.22828	33.23059907	24.94707019	22.58646138	16.99867386	13.70031296	26.60828088	20.22597675	26.00048524	16.85464432	76.88691	34.66887374	65.82986839	24.12277	16.17230287	37.1332914
GBE1	21.65434271	9.2438749	10.50614	12.98155885	18.81548	8.97561954	8.5339489	9.325086	8.355143	13.65171	24.13056879	10.12655076	17.35904	8.63610342	12.957	13.70632	10.43375543	9.37172907	11.97376	11.52433	7.70093029	10.50047574	13.38566086	11.7985015	5.73341181	11.94937856	8.69320837	10.51109	12.7932375	15.290946	15.68683	11.60881747	7.50469272	9.346135	24.70914103	9.89345282	14.01792924	3.84427976	12.02234874	10.43565784	14.26914695	11.98265862	6.76278	12.29809	12.56975438	16.69098439	15.76661	6.95966549	22.76363718
SQLE***	1.84055767	9.60152073	1.677721	10.98931568	7.765484	1.2042457	3.35637346	0.8362085	0.6268955	2.031541	3.2538052	6.12208804	1.440888	13.41809326	5.202047	6.514591	4.63912808	1.84893764	2.104421	3.249199	1.64091112	4.98025522	14.0368008	1.19085611	3.17884636	0.48606226	1.31738268	0.3145147	3.64335794	3.69500826	1.455274	2.44293227	2.35561935	8.681664	2.67226779	6.43346666	30.73168092	0.70666551	28.18005629	9.36010352	1.44786145	1.23550275	3.00493551	3.839333	2.03327025	3.50656068	2.748025	2.17524247	1.83643073
ABCF2***	2.89532611	2.82734199	3.184953	3.5758272	2.514082	3.59474011	2.73633938	1.830002	4.14517	3.580201	2.82234054	2.386566	3.045012	3.9209784	2.813007	3.077188	3.49457936	3.91728814	2.537925	2.90768	2.22959407	5.45987885	2.87877049	2.2044655	3.9618904	3.72000005	5.72537408	2.510339	4.22294073	2.73013594	2.919337	3.5036726	5.16946331	3.943642	3.14413276	3.92875881	4.04795638	2.42252886	1.9375035	3.18633331	2.7773786	2.4753659	4.85455926	2.832613	2.76781514	3.88997648	2.530567	5.29594356	2.5046597
HMBS***	3.08538478	2.34076292	1.823044	3.18398715	2.337943	2.33858835	2.30598613	3.077377	2.941096	3.890506	2.55405339	2.16836438	3.055128	2.0302038	3.731776	2.501457	2.4015057	2.88744163	3.3747	2.781497	2.05130893	3.13093816	2.51993913	2.77419278	4.34482301	2.2854668	7.01499238	2.02465	3.74523475	2.83194064	1.985447	2.28423881	2.92740275	2.813013	2.15240535	2.59830778	2.30160481	4.3853864	2.38040857	3.0902699	2.06923237	2.41023236	2.82675526	3.183592	3.24484482	2.24882198	2.89373	3.82444619	2.88658673
SLC2A3*	0.98731984	3.15234253	0.7385828	6.26266529	1.955569	1.236029	3.51229309	0.4914189	4.610643	0.6383064	3.06460529	0.55679641	1.188865	1.58377879	1.053646	2.294098	3.48398127	5.26307689	1.814317	1.66388	0.45333381	11.38471504	1.91858321	0.63180738	2.0558437	2.83788166	1.68521926	0.5081982	2.8033399	3.0551761	3.628222	10.42847584	15.50399248	5.49984	0.63061053	2.04722508	3.12953069	3.31809049	1.18398555	1.40079191	1.72773127	0.33053778	3.03123186	1.456186	0.90212258	10.00877487	0.8516196	1.75637576	0.4785975
ETF1***	6.91974006	10.30377321	12.77217	10.56444225	11.30961	10.48490952	8.80336499	4.998467	16.42382	10.84781	10.53201648	6.59918965	8.707575	11.594194	9.409038	16.99447	11.52014498	19.57087567	8.273676	8.082042	7.1527844	19.30456318	12.21064905	7.04121509	11.94350216	13.5558594	14.96934794	6.737882	12.67709504	8.45772213	13.29193	16.44546714	18.67443662	13.61047	10.3320005	14.88184134	17.56177738	7.72749469	6.62780192	14.01543682	8.62868001	7.76495184	13.26997773	16.58363	11.40356557	19.30693746	9.415375	16.40171684	7.85220602
TPI1***	131.4154476	61.91461646	58.26621	113.6767905	70.46723	79.85606771	63.58430864	59.30159	106.1469	94.63256	74.8000773	61.82175204	78.35803	72.40872816	95.06066	71.53023	81.44714367	65.53894134	111.2357	80.72443	87.29991715	86.97695642	66.90128873	77.87750577	96.16555732	71.33249655	153.2283075	62.17002	106.5144142	77.7101293	72.53803	76.41762239	93.62882074	123.3921	64.70482332	82.20984287	71.37239992	138.735103	73.56959006	77.98928889	74.51783475	77.09316983	89.46603185	74.43267	83.53119041	74.42095885	77.87571	90.18186469	89.11909227
P4HA1	4.77273108	19.52023741	50.5747	7.40347649	19.23606	35.73690871	31.30870493	25.39777	20.82528	5.673632	19.81561863	19.50247712	21.46563	26.45474427	5.265806	23.82644	5.88950408	35.07801422	13.06058	19.4	13.18055678	21.26980556	9.69380177	28.06760019	29.6172187	48.04478809	14.09875744	23.99142	28.80562647	5.5693917	25.74303	27.62242952	18.94962924	9.685548	37.38978597	32.00436305	9.65201829	22.11164926	28.70838142	14.08971796	4.37536517	55.70050119	29.06575682	9.408566	31.18431953	5.96586292	21.66174	20.89055603	8.92903747
PDK1***	0.35630417	0.36411249	0.8096504	0.39571385	0.4881931	0.52983668	0.79880214	0.2372566	0.8344546	0.4077082	0.82905679	0.42070678	0.4206094	0.52520721	0.5072745	0.7394167	0.48448522	0.6047397	0.4771802	0.360885	0.36085224	0.43649983	0.34047175	0.27183487	0.47207104	0.51158231	0.60823215	0.3012819	0.55030391	0.60217984	0.537197	0.57953259	0.46323404	0.6111335	0.53879682	0.43150009	0.32839198	0.44938416	0.68916964	0.65267801	0.53576587	0.47297041	0.56958692	0.762821	0.52144019	0.79124933	0.493908	0.49793773	0.534246
ALDOA***	23.23961536	21.53518602	12.82163	23.04741974	16.28047	20.33232694	18.70005297	9.521209	30.20995	24.74229	13.59973388	12.83132982	16.85149	18.13213392	14.12206	21.02869	19.79350782	26.16048648	18.46277	14.32814	12.98096543	30.23468969	17.82400094	11.41624767	32.034677	19.29012129	36.79782887	12.00003	28.20977588	14.60978522	25.75087	24.91905663	35.6256711	30.73177	16.57266849	20.1805677	26.90375932	25.56288806	13.25800666	19.96894522	16.50474357	12.55870363	33.51941232	17.43403	16.29384842	33.01233795	15.6801	27.85389401	11.01847652
PIK3R3***	0.37025268	0.42870522	0.8744813	0.8575388	0.6448813	0.90952241	0.64175828	0.2939636	0.7864325	1.618543	0.77457342	0.50439428	0.6143963	0.57886159	0.8891192	0.4977826	0.96028573	0.79519713	0.3393993	0.4268986	0.47357291	0.38401382	0.50507552	0.45637334	0.78665661	0.67630835	1.15540225	0.4746081	1.57044572	0.74348952	0.2039949	0.5574048	1.10566314	0.7671643	0.56599919	0.88375805	0.60818043	0.81797128	0.30566684	0.45174233	0.85253359	0.35792867	2.19545359	0.9324403	0.75851953	0.45048922	0.6329263	1.15698878	0.37739795
BUB1***	0.0101829	0.03097895	0.06771809	0.0706577	0.08116838	0.06332881	0.32251371	0.007602506	0.02375635	0.1322382	0.07754706	0.02874536	0.06289617	0.05414479	0.1500068	0.0379029	0.11534466	0.07693635	0.01184473	0.07374697	0.12899892	0.0237354	0.03834298	0.02303963	0.03839869	0.03206634	0.11752595	0.1253518	0.31454533	0.07718353	0.006038488	0.04315607	0.1171451	0.1077053	0.04162011	0.04198651	0.08067473	0.03849944	0.13127093	0.069106	0.0372371	0.02852088	0.17059345	0.08534761	0.10685803	0.01229784	0.04125602	0.29710809	0.02756623
PSMC2***	13.07284231	15.4805379	15.1192	16.06025289	14.01014	15.46290928	14.80390817	9.462004	15.27624	19.38111	14.59685105	12.27390373	15.74178	15.21308703	16.56376	15.91408	17.84180842	16.03456028	13.87348	14.9808	13.49351068	15.19532652	14.89284834	11.26919178	14.71362138	16.81366034	19.86766618	14.13498	19.04219596	14.22285755	12.00926	13.35677995	17.0843962	17.12338	16.98421725	15.7483808	15.82949847	13.22613586	11.11223641	18.04789086	12.76866236	12.67106196	16.52754425	16.42739	19.67224782	18.38264698	14.80347	21.31139542	13.522653
FADS2*	22.49289466	9.6788159	1.39935	5.50830148	11.69268	1.58873587	1.02695823	5.020042	0.8036108	31.43848	8.74731106	7.58854425	6.80431	6.75556688	7.611463	6.12252	13.27716511	1.77414099	18.89929	8.529189	7.66738701	1.11832793	15.99730169	3.79669657	0.98556862	0.39869439	2.16294939	6.90866	25.80890528	15.69004528	9.333979	3.78695019	4.72682252	1.769309	22.14097864	7.08611564	18.76111604	2.73594222	39.71005524	8.69763816	17.89620526	9.55679594	3.03978242	0.3882739	29.03769578	3.90379732	14.80589	4.05908432	11.57098889
RPA1***	5.71136423	3.57942501	5.906167	4.92439674	3.294956	5.61413142	3.73298466	2.383931	4.57918	6.126038	4.68445239	4.52879167	4.169004	3.84563372	5.63775	3.396983	6.14138741	3.7999892	4.110959	4.085906	4.11713301	4.33400142	3.73274752	4.03474166	4.53021535	5.38534541	6.69569812	3.301045	6.24730242	4.75432918	3.083983	3.04620035	5.96719876	3.427282	5.74094024	5.65894731	4.47658301	3.30667858	4.46616864	4.6805513	4.79022871	4.27327766	6.66788668	3.749576	5.31897397	3.33623417	4.196635	5.78852646	5.06721437
STIP1***	9.55355721	6.43213782	8.00174	9.1228501	5.971594	8.74172711	7.12295695	6.100328	8.590104	8.619163	7.22919388	6.78459987	9.238307	11.53425699	9.308039	7.023701	9.81969997	10.31248808	7.416294	8.48015	4.90447793	14.03819825	8.673126	5.86564743	9.33794716	6.9210873	15.39044049	7.865139	9.75422372	7.70619878	7.199578	8.26546445	10.42854864	8.858619	7.59794685	11.99149722	9.10009139	6.38790795	6.0459238	8.76654041	7.01165702	4.90402301	9.7398613	5.94044	7.04775258	8.19936497	9.265161	11.90894635	7.53056853
PSPH***	1.84581127	0.99453877	1.573025	2.17438361	1.262131	2.33143326	1.86019496	1.095818	2.265518	3.362438	1.62948838	1.50666502	1.874971	1.52934254	2.922838	1.638986	2.43888932	1.59876622	2.524717	1.801462	2.07149942	1.56156946	1.80417724	1.83935935	1.69117344	2.69299033	2.42847257	1.827181	2.67907889	1.53111403	1.015445	1.50171039	1.92914236	2.639695	1.93553296	2.18103974	1.68527217	1.90861328	1.88679268	1.9848568	2.10423315	1.50008936	1.62626812	2.609498	3.332522	1.49059414	1.739624	3.9282438	2.12898178
DAPP1*	0.03601481	0.20954523	0.2816903	0.62617399	0.06889817	0.32397236	0.16086289	0.01512477	0.3360852	0.1879149	0.16678452	0.21180499	0.4671465	0.15798658	0.186519	0.2144875	0.59454102	0.35250346	0.1885156	0.1485269	0.22476649	0.11411572	0.12482393	0.15618227	0.37771655	0.28224126	0.32373904	0.08119367	0.73006607	0.17914453	0.07608388	0.18316089	0.53329439	0.226178	0.25976773	0.36196281	0.32564816	0.2246715	0.0890766	0.29996213	0.16668269	0.11032922	2.09737227	0.238308	0.26360945	0.11417412	0.1178536	0.48990454	0.11965423
MCM2***	2.21785339	0.79289939	0.5189083	0.63628358	0.7550864	0.55105703	0.80389383	0.3788784	0.2923262	2.034019	1.15539279	0.46376218	1.106747	0.25317934	3.541745	0.223873	0.9580525	0.37581748	0.8628493	0.6957269	0.65050434	0.27746501	0.43750336	0.35595861	0.41737748	0.55600218	1.24964629	0.4914401	3.31898578	1.18719666	0.3566625	0.32216625	0.71684996	0.4896371	0.94897096	0.56462635	0.76396067	0.6348151	0.74755163	0.70863486	1.64955336	0.44161783	1.03293149	0.3924498	1.25705152	0.23834023	0.3748894	2.24957373	0.53348083
QDPR***	60.68031938	44.94168344	32.30269	50.55740768	48.79751	47.52470161	72.99411614	55.27284	51.95091	34.08489	51.64772982	58.77984253	47.04854	40.57871367	57.80507	39.62726	39.4671469	38.014782	63.77249	45.03192	61.82716218	34.25432071	50.67797883	82.9579795	87.58661365	59.43731223	33.37762706	38.40479	34.42891061	41.87957876	56.26752	44.11524883	28.14415275	53.80951	54.17111323	46.68911876	41.2159155	57.11199653	34.49344462	33.6460951	47.21376896	44.340494	33.12115206	56.2285	34.3671071	52.44655238	48.28564	18.90596892	50.3893737
SEC11A***	7.03852732	8.38096855	7.93978	8.44622123	7.727419	7.22491185	7.94920371	5.277536	10.25043	9.287807	7.56160622	8.88880522	7.346221	8.17829166	7.590518	7.74564	11.28182029	7.00215725	9.727688	8.481447	8.16216901	12.47586079	6.49651927	9.45090583	10.8899691	6.23149671	13.84805235	6.6568	8.78855404	6.97924577	6.729724	7.99792187	12.32653176	6.483348	9.23886452	9.04509274	7.05997049	8.62575021	7.50614502	11.68677542	7.34157785	8.93661422	10.9118301	10.09722	8.71758658	7.91749702	7.236828	11.08391423	8.26821566
PGK1***	29.15572615	19.42844271	24.60522	27.25465272	19.16477	27.73413491	25.41239975	8.248568	32.87173	34.17495	19.73501006	21.02691937	21.52327	20.65962103	24.84031	27.81845	29.88499032	30.17254201	29.71896	15.15209	25.98669027	27.20663548	20.7618597	21.4073207	26.35231078	34.5185786	39.11066967	13.39194	31.73908537	20.85683749	23.41841	24.35397982	36.58739857	21.50931	26.76202753	29.43872842	24.9713142	21.81619639	19.25792638	29.07982485	26.56275291	21.05862871	29.73236297	28.40161	30.58690646	29.65852447	27.15696	31.27734369	27.56669248
NUP205***	1.22002716	1.22630949	1.917874	1.58412051	1.092444	1.69035797	1.24830788	0.3822028	1.623759	1.985441	1.36229175	1.3401843	1.299655	1.26599638	2.109865	1.498395	2.08995851	1.74057487	1.220955	1.037971	1.28962997	1.42814908	1.21425313	1.24036016	1.07921528	1.86941252	2.11619731	0.8354759	2.17691183	1.64478547	1.049364	1.41678637	1.82731451	1.070623	1.5952088	2.01582458	1.73839075	0.68580445	1.2664695	1.66953152	1.41139309	1.1101892	2.19954331	1.113129	1.57525256	1.37768068	0.9773653	2.12123576	1.27771476
GSR***	11.04366337	14.69173697	12.67058	19.60048195	16.45638	16.20956068	9.43091075	9.406834	11.80503	25.02922	13.57569313	10.20723361	13.39643	14.83848359	14.80639	16.63108	14.51818324	18.05559601	10.78443	14.10887	10.61929572	21.58968351	17.99250361	9.473946	13.32100305	12.94492217	21.61964413	12.26061	25.78042134	14.99406272	12.92906	18.26591332	18.52553238	18.43131	15.48862105	15.44679414	17.11842646	12.41135396	8.31129961	12.85416944	15.13560968	10.43459383	16.75750303	18.06375	17.26413766	14.00195288	12.08769	29.41313143	11.26368826
RAB1A***	20.39116302	25.32271411	30.3453	33.19219712	34.35051	27.21170237	29.67684758	21.56164	30.39808	28.39136	30.18549996	21.21129242	30.05805	32.94419998	28.8991	34.49211	30.29116271	38.34809382	21.96445	27.21743	21.40466101	46.09666011	36.622538	17.40393272	25.71821118	31.03272169	39.31136294	24.60958	31.97591121	27.28058031	34.65911	35.41469452	37.79439402	36.35622	29.89089923	25.7835717	39.41908766	18.10769484	20.94180755	41.5678794	25.20344667	22.60026119	31.31122793	39.5462	33.68526603	50.56394246	33.17392	39.70459302	24.17279038
IDI1***	13.17801938	30.79706629	12.78329	26.7519833	27.1692	8.44647032	14.4591901	11.455	11.01988	19.05808	26.471617	22.18597792	14.87855	37.72887107	19.85012	28.14401	23.58027221	11.15952003	16.36383	21.16261	14.63236851	24.26423388	31.49490702	9.94307803	15.580145	9.63225909	10.78789364	7.172837	25.54277496	17.27460117	14.05613	12.78014152	14.42579672	45.96887	21.23616426	20.78682778	61.59291354	11.983489	95.13592386	42.32987416	12.46205045	16.59342343	16.01962463	30.6213	20.0607981	26.17195116	18.25739	15.68219174	18.30889778
UFM1***	4.47615128	9.44133267	10.14367	9.40358083	9.470366	8.32518118	10.21851149	5.86572	9.347201	8.139398	9.07635114	7.98417598	9.428467	9.37618654	8.285427	8.94973	10.63081443	10.96608468	6.913214	9.63647	7.87933206	11.4599634	8.59365158	7.15349083	9.02979615	7.88110676	11.96336612	7.532086	10.04162867	8.87156137	6.990579	8.76437596	10.8389487	8.125512	10.67985954	9.88313647	8.57997648	5.17771269	7.8793487	12.34347423	7.65031189	7.93709147	10.57102217	9.850142	10.46135325	9.89469116	8.378794	10.75510258	7.80998262
HK2	0.17219582	0.63479878	0.2939378	0.38017706	0.2938938	0.48595854	0.8582401	0.01512477	0.4135423	0.4979744	0.24392236	0.26687428	0.4598474	0.49909397	0.2401432	1.058194	0.4771974	0.64007207	0.322833	0.1603004	0.16857487	0.62271769	0.26698451	0.15024055	0.50291473	0.4465598	0.36570521	0.0666948	0.74049558	0.14715444	0.6036655	1.5425581	1.21250988	0.3660513	0.41644015	0.33113631	0.33495239	0.20297027	0.11539469	0.28746371	0.13890224	0.17022223	1.43296496	0.2636282	0.20195885	0.60858885	0.1262717	0.6469935	0.14707499
GCLC	6.90464331	11.77318198	10.56368	15.5913846	17.24474	8.96303546	6.76058051	8.336644	8.714506	13.1247	13.09788413	8.85547558	9.228096	15.10735442	11.28813	17.24655	11.53768795	10.70638311	9.698546	11.03047	10.95034165	10.26463163	13.25950742	10.78891815	9.28253353	8.95718992	13.68831808	6.925232	13.2217268	7.89429805	12.86014	15.65452062	7.31372184	13.83084	13.16764578	12.60306434	19.44529967	5.26856868	7.85931729	14.84971829	8.19776741	9.30017167	11.66109975	15.067	12.36582779	9.60893746	9.839436	8.66895637	11.04386079
CXCR4	5.19225414	6.07479423	3.047203	26.28080552	6.102484	9.6677652	6.72870338	0.8557194	14.15372	14.02619	6.12217676	3.07524839	11.20769	6.06013889	8.117987	6.675237	38.60034858	11.55268027	7.440298	10.21577	6.05077529	12.75447012	3.46965114	3.39522403	13.59106324	6.90235928	4.42173787	1.336212	26.59599543	7.5711118	3.22642	15.38026434	51.96942183	12.40706	9.11034878	6.92209885	6.84014251	12.00822496	4.28072355	6.99743785	8.33213581	3.9257756	62.75674566	2.473206	7.5064306	8.5054148	3.563451	11.60098399	3.29649919
CCNG1***	12.36004266	27.45636515	23.53868	23.35905037	19.86264	19.90020935	15.81104268	10.30183	21.8928	27.19048	25.91746319	32.35854766	21.63477	17.19509673	20.18886	18.28944	30.63966959	11.9553948	26.51124	25.65535	25.16761886	20.37055609	17.44687627	30.46937413	22.35036739	16.33450696	24.89991309	16.77772	29.16073597	22.79483536	17.00618	14.77037854	23.65637331	16.00647	31.47219507	32.61609021	15.92304093	12.06898784	30.12589231	21.35889884	19.60658358	23.77839065	22.685619	28.11958	22.81802725	12.54312745	11.86532	19.30060703	22.82583541
ELOVL6*	3.28286585	2.61974696	6.101662	7.68603516	15.30619	4.45350634	2.11231676	5.282159	2.346738	4.720003	15.53212552	8.32201496	5.014683	5.25462493	9.491948	5.18024	7.50870532	6.1748605	3.898912	11.05675	3.57752672	6.07014121	11.94934824	2.82296727	3.5207093	4.71349016	7.37108009	7.140205	7.23278092	9.30993208	4.532429	3.28443968	8.84880395	6.877849	12.08016616	7.16715447	15.89808967	4.13409605	12.30497604	10.65483763	4.62880056	13.79423399	3.29493305	7.044044	9.08595677	2.96335931	6.471875	9.23329845	11.30046792
TOMM40***	5.50143711	7.16919889	4.695771	5.90851391	5.745091	5.81237729	5.64685877	8.288795	7.297232	7.607294	4.49308256	4.90450226	6.594655	7.0266033	7.613447	6.692133	5.56291837	6.45497101	5.53767	6.142987	3.85024528	10.25702056	6.10391686	4.41007346	9.04668805	5.04627198	15.3374517	6.863208	8.07638548	6.14742926	6.492783	7.91768748	8.18402336	9.483227	5.93984469	6.91035063	8.35177345	7.93179776	4.39705082	7.21513703	4.97759961	5.17464041	7.22119072	5.576744	6.26712572	10.50548774	5.679205	9.37873066	5.16718459
SLC37A4*	29.09644864	32.28300482	22.7301	28.19208773	32.59302	31.54216665	24.43035879	23.38878	28.16857	33.40166	20.01385656	29.8361116	20.43222	18.67952739	23.42186	26.40866	15.13019733	19.25994404	31.36941	19.35472	27.76697385	18.2002648	20.96471574	35.84085766	31.08684681	19.71308753	17.75420851	26.23706	25.56978591	25.43857288	29.44374	27.30541402	23.55274055	14.65377	27.79764193	21.5526458	28.55930288	24.44669949	31.42025776	16.7626804	21.92221348	36.94671673	21.9973492	22.07159	22.469215	44.20734406	22.99549	27.37644206	26.90929409
WARS***	4.65005714	8.80246608	4.868088	7.48961511	4.46946	5.39018629	3.73187516	1.680558	6.968082	6.160877	3.35642435	4.31192309	6.608589	5.62657033	5.95056	15.82936	6.82696998	5.30626229	3.380211	3.695224	4.37944995	7.33536662	3.57155844	3.09173484	6.23860891	4.64076453	10.92413416	2.287222	13.71227652	3.68570972	3.414407	4.59929578	7.88182986	6.184901	5.78355006	7.92974943	6.10974656	6.81199107	2.57479501	6.69931143	4.18192888	2.58408655	22.76896849	4.312798	5.26359726	7.51956122	5.000972	11.51621072	3.50209757
FKBP2***	30.67343232	61.64919372	30.13685	41.34846389	41.19037	37.50083077	41.6925191	87.45306	45.06292	33.02328	27.69819974	32.27737266	43.2358	30.60195038	39.03815	31.70681	39.80710801	37.16908542	48.14703	39.94928	51.14226324	41.38007544	41.96026299	45.73923508	60.35394781	28.83647601	39.14686228	49.85479	40.02933565	33.19992497	36.76393	50.0560595	43.94398405	47.59685	33.08059705	26.75277429	33.13147141	108.9943695	41.31824876	40.18118295	31.79589754	54.23438676	38.51814952	37.77884	44.62267953	38.00139017	58.54742	48.67762738	45.95999904
DDIT3***	4.57682545	8.26575215	7.391629	13.78761762	8.368965	4.61227005	7.7752016	7.715498	18.1481	6.660677	14.20008143	6.14800609	4.704912	12.00462032	4.869059	8.34338	7.96880392	11.03048307	3.002372	13.35228	5.53166922	26.12379086	5.14852134	8.05016145	12.36470066	3.79181414	20.6038655	9.611601	8.84225177	7.50822176	12.75996	7.82734292	13.47105167	5.27429	6.9056359	8.13058099	6.50110137	13.81265067	3.98545838	12.28251978	4.98994777	5.27709816	10.0117765	7.426682	6.65951391	16.47968577	9.359706	13.36535234	3.53430499
SYTL2	0.14175438	0.22889557	0.7647008	0.42990095	0.2381546	0.40446541	0.33650286	0.09769213	0.7080543	0.3818278	0.49038439	0.43436077	0.3535942	0.28216934	0.3940508	0.3274071	0.750914	0.59542576	0.2092815	0.2983336	0.29658664	0.38283817	0.391926	0.23438009	0.37692018	0.32464722	0.74703639	0.2310018	0.69049205	0.26172702	0.1794373	0.29884359	0.81029265	0.3267807	0.28182816	0.51222876	0.47889629	0.2164389	0.43151471	0.73103972	0.36884097	0.23033068	1.00472363	0.1851911	0.38561919	0.35226876	0.2480781	0.55891748	0.5393893
SC5D***	17.10125427	36.03346155	18.94735	24.05447243	36.05117	11.44174618	21.49071619	22.88796	14.10842	29.77256	26.54512569	37.44816557	24.37814	27.73118871	20.33342	20.68051	20.73606423	7.97646326	28.26833	19.57183	36.54785554	13.4400541	30.06559698	24.13905849	28.00243433	12.98108638	11.76988152	21.26156	24.87002792	18.6947768	23.27063	16.51576631	13.27171394	18.46164	36.77356238	20.16051392	38.43836456	5.7285287	69.35071392	37.07594522	19.98565825	27.24346004	9.94515365	38.14125	32.22374937	23.68286977	16.25383	19.42629288	31.76436485
LDHA*	54.35117927	63.35356753	104.5197	63.35083067	75.83005	86.98900821	101.4671422	64.33826	105.9815	48.79641	69.03573305	69.64843698	51.84687	86.4345292	65.58412	81.9731	66.73929099	151.2693179	67.75194	61.63633	49.98050288	110.9755485	106.5210531	60.40901958	62.3685527	127.3864359	97.92350802	98.61893	60.58392879	71.01645226	91.35366	113.3966679	92.66593398	98.92225	80.26689336	76.89639709	95.58499359	79.34665127	46.36555718	106.3791719	70.18288954	84.15360462	78.51196837	91.70624	56.73233104	148.4626532	105.9789	73.34395433	73.03786153
USO1	3.20414864	9.80349063	15.35385	13.95130312	13.43326	14.25539595	11.91241877	3.458365	7.454344	14.49232	12.2978282	13.24417496	12.30867	9.79993869	15.37076	15.62074	16.56060317	18.93359929	10.59565	8.015166	11.50947232	13.84364734	14.85744496	9.91861623	8.87678098	14.90118984	14.47294041	6.733978	16.51761519	15.53425607	10.76529	14.23764512	13.34932479	10.02241	15.55639855	11.83669067	14.92761181	5.26411887	10.92110428	20.01585409	11.78025014	10.14303836	11.59161952	15.15418	15.03522839	15.06489445	12.29178	18.18309834	13.70286974
CTSC***	2.10642187	3.9202227	2.396275	3.1533589	1.740484	3.93959143	3.21308237	0.6846023	4.755281	3.21022	2.21054254	1.86736889	4.05267	1.65669422	2.224519	3.339071	4.83339051	3.81096983	2.227063	1.573846	2.34717166	2.94749177	2.27361725	2.58375254	4.07971281	3.8582915	5.73920981	1.344106	4.9270524	3.18981998	2.41265	3.00106172	5.37601652	2.882151	2.67917631	3.22490304	3.31418885	2.64131852	1.58009561	2.85682343	2.57634689	1.57160412	10.50867949	2.339224	2.77557448	2.10116547	2.007973	4.52657824	1.63326647
PPIA***	30.12955122	28.37127372	20.32239	31.06158383	28.29826	24.15816297	26.25789451	22.83086	28.79762	36.2655	26.14883976	21.0349992	26.33985	25.54643505	30.0914	26.55661	31.47912813	24.70549939	23.40741	31.47542	29.21673443	29.47752698	25.17224922	23.94643969	32.55426569	21.94828143	47.12903896	25.45984	39.73121007	22.76031713	21.52822	28.2441259	36.91584076	43.75655	22.88475198	25.1678889	26.05105073	36.60011217	27.31022651	30.37659486	24.54817116	25.47056745	31.63169695	30.33584	32.69668204	24.46602707	25.13787	41.27461142	26.9412896
ITGB2	3.99427419	6.83733049	4.097484	6.98307907	2.573015	9.50602797	4.1244302	0.7286594	8.671969	5.985098	2.69138734	3.97957292	7.473927	2.54348947	4.203793	6.462778	8.34953628	5.66080002	4.374932	2.312453	3.99109173	2.23804901	1.96122092	3.00791165	8.31193065	7.03153727	8.98036385	1.38925	10.30969473	3.88147109	1.792538	2.05792589	14.91411175	3.544541	6.04443248	6.42485034	5.41941668	5.80486156	2.47893561	4.72040837	2.82543955	3.18916863	37.31962887	4.803622	4.5481041	3.05311334	2.810726	5.2686228	3.01792606
PSMC4***	21.28070275	19.71985902	12.62436	20.37944905	17.5988	16.66632186	15.95865652	13.84203	19.31055	23.29634	14.34237868	12.12283358	18.25426	14.73149489	18.44414	16.89585	18.76723635	17.87483933	14.22363	15.77849	14.75872146	21.89265179	18.90304758	10.32463788	19.45537752	16.67792836	27.2545986	16.0446	22.92516682	16.0424039	15.56457	17.87069397	22.51414314	20.09549	18.52934565	17.264115	17.7364097	22.06512484	10.83118841	18.36285397	13.91488153	11.95808959	20.35034028	17.83294	20.16602878	21.52852207	19.36734	30.78950236	16.05990043
DHCR7***	37.57253046	44.54215704	17.83063	36.05437584	55.76819	16.15495456	17.43076362	19.29136	15.77085	49.75109	33.17683277	32.31186471	22.97314	46.76575371	24.8539	40.97026	32.98241369	8.48852773	35.36991	32.00864	20.54598641	38.80441531	50.25492598	18.98286475	31.28644999	11.79312694	24.96763555	15.63137	35.47625683	36.41936929	37.59306	22.89458261	33.88485437	40.74373	25.48864736	21.28640815	65.53331462	21.28576349	125.0640995	59.54832279	30.51324274	43.75043106	17.99056839	21.88492	18.10677244	21.55872493	17.61965	19.60364697	17.25295135
HSPA5***	95.60317982	35.77117096	151.0071	147.1122889	124.4165	146.8594759	128.5940999	81.84207	120.9187	91.4266	83.47195617	64.12724799	131.903	110.5441371	161.8253	102.3103	87.62536813	253.9118715	96.76847	130.4432	47.34130565	130.8486431	132.6815869	43.41686449	101.7638302	100.1632056	106.0593344	121.4698	126.7116821	127.4026179	92.15554	121.3970843	114.3132439	97.75102	120.2320766	51.24318147	106.4063238	91.25135165	52.44946339	132.7948676	93.64192849	49.42201872	116.3793153	73.79882	83.46062248	143.3546893	217.4578	134.9938167	117.9173369
EGLN3***	0.097378	0.20568105	0.1110139	0.45806656	0.1011284	0.26696133	0.38184891	0.01246319	0.5225128	0.3096931	0.20615192	0.19634918	0.1263086	0.56216203	0.1556175	0.2029784	0.40396637	0.27709468	0.2368959	0.2194063	0.12232365	1.02626989	0.09428653	0.16786708	0.18360128	0.12186233	0.22230755	0.2437276	0.54358197	0.18979659	0.2920268	1.13196863	0.88754637	0.4316084	0.15251426	0.44248313	0.77340063	0.19880967	0.20769245	0.12530465	0.31285438	0.07597816	0.37066433	0.1067771	0.09985149	2.11937254	0.1040511	1.05091973	0.09654395
NUFIP1***	0.72117804	1.2842958	1.036821	0.87655869	1.127275	0.93765197	1.16658263	0.8864365	1.750877	1.150284	1.22367873	0.94342744	0.9506472	1.3717506	0.9150113	1.056291	1.1999905	1.36522569	0.8061364	1.188962	0.79956556	1.69124935	0.98747053	0.73405434	1.00598988	0.85603749	1.61888748	0.7956209	0.9825368	0.7777294	1.12652	1.28220489	1.67898915	1.291998	1.28562712	1.26921404	1.18755267	0.53867465	0.89647072	1.17925164	0.70754754	0.82521057	1.22081372	1.06303	1.0299792	1.68881857	0.7126469	1.57201801	0.90472808
PSMB5***	35.43872797	29.28434558	22.03853	31.19446266	27.39584	23.63727649	20.01879268	25.82616	33.34155	35.34759	24.45365333	22.43126396	27.95447	24.3023476	31.37626	26.19209	32.56610908	24.5724607	31.90643	26.79972	28.68196454	31.83852029	25.12386198	27.86500256	27.44893319	25.81313803	43.93459752	30.25683	35.97595396	27.78478733	24.5992	28.53413139	37.26509063	35.06056	26.85814399	23.58386219	25.42535359	39.3538713	28.4095499	30.34479946	24.81573119	29.37965968	29.74296726	29.52118	47.43871687	28.83165065	29.61981	46.341844	25.6763293
TUBA4A***	6.63574013	5.25457711	3.605079	4.50249021	2.515856	7.23782728	1.84250378	8.072143	6.83293	5.231045	3.37519694	6.06454116	4.250579	3.31485554	5.646244	3.056625	6.89649476	4.87500082	7.45127	9.508117	6.3924241	6.79180468	9.65469594	6.4356079	6.42602666	5.35840486	9.47860216	10.05306	7.13226452	6.45833817	3.379883	1.92733166	9.34524261	3.871242	7.56310988	7.15801896	6.73274289	14.72849871	3.81924993	7.57161082	4.80450782	12.40340472	7.41200739	4.457259	4.60157132	1.65037649	4.068841	20.08397133	6.98189336
ADIPOR2	16.32241151	16.26088257	19.82109	25.94170258	31.13565	13.96313413	12.71238812	13.13804	14.61506	27.20356	26.40293716	18.6889224	18.05619	16.43934191	26.20294	30.39847	24.42118674	17.80009595	15.44665	21.86285	22.77950357	22.33864747	23.75160852	13.41360734	18.47095726	15.97758353	17.55576761	12.21742	36.4721532	22.21719581	26.51255	16.92048413	15.8292904	24.37431	26.35491268	19.62591234	36.92720952	8.22953783	22.69395981	19.68685879	20.19540581	20.33889498	14.45519307	27.24774	21.62887369	24.81098652	15.53439	22.05386498	23.72886453
[truncated: 375 more columns]
